# Supplementary material for: Astrocyte-targeted gene delivery of interleukin 2 specifically increases brain-resident regulatory T cell numbers and protects against pathological neuroinflammation
Source: PubMed Central journal article supplement (PMC9174055; doi:10.1038/s41590-022-01208-z), 2022-05-26
Supplement: 41590_2022_1208_MOESM1_ESM.pdf [file 41590_2022_1208_MOESM1_ESM.pdf]

---

**Supplementary information**

---

**Astrocyte-targeted gene delivery of interleukin 2 specifically increases brain-resident regulatory T cell numbers and protects against pathological neuroinflammation**

---

In the format provided by the authors and unedited

## Supplementary Methods

### *Behavioral experiments*

Behavioral experiments in healthy mice were performed in 13-18 weeks old female mice. Mice were habituated to their new environment for at least 5 days and tests were conducted during the light phase of their activity cycle. Behavioral experiments in TBI mice were initiated on day 16 post-TBI and were conducted during the dark phase of their activity cycle. The general health and weight of the mice were routinely recorded during the testing. Tests were performed and analyzed by an observer blind to the experimental group. If tracking error(s) occurred, mice were excluded. Behavioral experiments were recorded using infrared cameras. Sham operated littermates were used as controls.

*Open-field:* Open-field exploration was tested in a 40 cm × 40 cm × 30 cm (w×l×h) square arena illuminated by indirect light. Animals were dark adapted for 30 min and tested in the arena for 10 min. Movements of the mice in the arena were video-tracked for 10 minutes with Ethovision 7 software (Noldus).

*Nest building:* For the nest building test, mice were single-housed with 1.5 g of cocoon nesting pellets and left undisturbed for 24 hours. Nest building was scored on a 5-points scale. A score of 1 is given when the pellet is largely untouched and score of 5 when > 90% of the pellet is torn up, the nest is a crater, with walls on more than 50% of its circumference<sup>1</sup>.

*Sociability:* Sociability was evaluated using the three-chamber test<sup>2,3</sup>. The set-up consisted of a rectangular transparent plexiglass box divided into three compartments, which were separated by two partitions. The central chamber (42 x 26 cm) was connected to a left and right chamber (26 x 26 cm) connected by guillotine doors (6 x 8 cm). The test consisted of two consecutive stages: acclimation stage and sociability stage. After habituation to the central compartment (5 min), wire cages (11 x 10 cm) were placed in the external chambers, which either contained a 'stranger' mouse (same sex, 'stranger 1') or were left empty: approach behavior to either of the wire cages was recorded for 5 min (sociability). Animal behavior was recorded using a webcam and ANY-maze™ Video Tracking System software (Stoelting Europe).

*Forced swim test:* Mice were individually placed into a glass cylinder (20 × 14 cm) filled with water (16 cm depth, 25 ± 1°C). Individual mice were placed gently in the water and left for 6 min: the degree of immobility (passive floating, no active swimming or escape behavior) was scored for the final 4 min using ANY-maze™ Video Tracking System software (Stoelting Europe).

*Light/dark test:* The apparatus used for the light/dark test consisted of a cage (40 × 40 × 30 cm) divided into two compartments of equal size by a partition with a door. One compartment was brightly illuminated, while the other was dark. Mice were placed in the dark compartment and allowed to move freely between the two chambers for 10 min. Mouse activity in the light compartment was tracked with Ethovision 7 equipment and software (Noldus).

*Rotarod test:* Motor coordination and equilibrium were tested with a rotarod setup (MED Associates Inc.). Mice were first trained at constant speed (4 rpm for 2 min) and then tested on four trials (inter-trial interval, 10 min). During the test trials, the animals had to balance on a rotating rod that accelerated from 4 rpm to 40 rpm over a period of 300 seconds. The latency to fall off the rod was recorded (up to a 5 min cut-off point).

*Contextual discrimination fear conditioning:* Two identical conditioning boxes (25 × 25 × 25 cm) with stainless steel grid floors to deliver shocks were located in sound-attenuating dark cubicles. Animal movement was monitored by motion-sensitive platforms connected to an interfaced computer using Panlab Freezing v1.2.0 software. The degree of motion measured ranged from 0 to 100 (arbitrary units). Freezing, defined as the absence of movement except for breathing, was recorded when activity remained below a validated threshold of 2.5 arbitrary units for at least 1 second. Contextual fear conditioning was measured in three different contexts. Two contexts (A and C) were very similar in tactile (grid floor), olfactory (odor) and visual (dark) dimensions, but C had in addition an inserted ‘A-frame’ roof (adapted from <sup>4</sup>). In contrast, context B was different in all dimensions. On days 1 - 3, mice were placed in context A, and after 3 minutes a single mild foot shock (2 s, 0.5 mA) was applied to induce contextual fear conditioning. After another minute, the animals were placed back in their home cage. On days 4 and 5, fear memory to A, B, or C was measured by placing the animal for 4 minutes in each of the contexts and measuring the amount of

freezing. The amount of freezing in C compared to A indicated the amount of contextual generalization.

*Morris water maze (MWM)*: Spatial learning and cognitive flexibility were tested in the hidden platform MWM. For the healthy mouse experiments, a circular pool (150 cm diameter) was filled with opaquified (0.01% Acusol OP301, Dow Chemicals) water ( $26 \pm 1^\circ\text{C}$ ). The platform (15 cm diameter) was hidden 1 cm underneath the surface of the water. For spatial learning, the mice were trained for 10 days to a fixed platform position<sup>5,6</sup>. To evaluate reference memory, probe trials (100 seconds) were conducted on days 6 and 11 during acquisition learning. During probe trials, floater mice were excluded. For cognitive assessment in TBI mice, a modified MWM was performed on days 19-26 post-TBI or sham surgery<sup>7</sup>. On day 19 mice were habituated to the water maze over 2 sessions lasting 1 minute each. Starting on day 20, the escape platform was positioned in the target quadrant and spatial cues were placed on the wall surrounding the maze. All animals underwent 2 sessions per day, with a 30 minute interval, for 5 consecutive days to assess spatial acquisition. During each session, mice were placed in randomized starting quadrants facing the maze wall. Trials lasted a maximum of 60 seconds, after which mice were placed on the escape platform if they did not succeed themselves. On day 26, a probe trial was carried out to assess reference memory. The escape platform was removed from the pool and mice were allowed to explore the maze for 60 seconds. For assessments in both healthy and TBI mice, swim paths were tracked with Ethovision 17 software (Noldus).

*Novel object recognition*: The novel object recognition (NOR) test<sup>8</sup> was performed on mice on day 17 post-TBI or sham surgery. The mice were habituated to the test environment on day 15, followed by training on day 16 (free exploration of the environment containing two identical objects for five minutes) and testing on day 17 (replacement of one familiar object by a novel object with five minutes of exploration). The ratio of time spent exploring the novel object over the familiar object was calculated and used as a proxy for learning and memory. Activity was tracked and semi-automatically quantified using Ethovision 14 software (Noldus).



### *Functional imaging in acute brain slices*

Recordings were done in (i)  $\alpha$ CamKII<sup>IL-2</sup> mice and littermate controls (mixed gender, 2-3 months old, or (ii) female age-matched AAV injected mice (2-3 months old). Preparation of acute brain slices was adapted from a published protocol <sup>9</sup>. Briefly, animals were anesthetized using intraperitoneal administration of nembutal (50 mg/kg). Transcardial perfusion was performed using 20 ml of ice-cold N-methyl-D-glucamine-based artificial cerebrospinal fluid dissection solution (NMDG-ACSF), containing (in mM): 93 NMDG, 2.5 KCl, 1.25 NaH<sub>2</sub>PO<sub>4</sub>, 30 NaHCO<sub>3</sub>, 10 MgSO<sub>4</sub>, 0.5 CaCl<sub>2</sub>, 20 HEPES pH 7.4, 25 D-glucose, 5 L-ascorbic acid, 2 thiourea, 3 sodium pyruvate, 10 N-acetyl-L-cysteine. The solution was adjusted to 305–310 mOsm/l, pH 7.4 (HCl) and bubbled in 95% O<sub>2</sub>/5% CO<sub>2</sub> gas for 20 min before use and throughout the experiment. Following decapitation, the brain was swiftly removed. Coronal slices containing the visual cortex (350  $\mu$ m thick) were obtained using a VT1200s vibratome (Leica Biosystems). Slices were further cut along the midline to separate the cerebral hemispheres, and placed in a chamber containing NMDG-ACSF at 33°C. Slices were maintained under these conditions for 25 min, with the controlled reintroduction of Na<sup>+</sup> achieved by gradual addition of 2 M NaCl to the chamber. Slices were then transferred to a storage chamber containing 20 °C holding ACSF (in mM): 92 NaCl, 2.5 KCl, 1.25 NaH<sub>2</sub>PO<sub>4</sub>, 30 NaHCO<sub>3</sub>, 2 MgSO<sub>4</sub>, 2 CaCl<sub>2</sub>, 15 D-Glucose, 20 HEPES pH 7.4, 5 L-ascorbic acid, 2 thiourea, 3 sodium pyruvate, 10 N-acetyl-L-cysteine (pH 7.4 HCl; 95% O<sub>2</sub>/5% CO<sub>2</sub> gas; osmolarity 305–310 mOsm/l), until they were used for dye loading and recordings. For recordings, we used recording ACSF (in mM): 1.24 NaCl, 2.5 KCl, 1.25 NaH<sub>2</sub>PO<sub>4</sub>, 26 NaHCO<sub>3</sub>, 2 MgSO<sub>4</sub>, 2 CaCl<sub>2</sub>, 15 D-Glucose (pH 7.4 HCl; 95% O<sub>2</sub>/5% CO<sub>2</sub> gas; osmolarity 305–310 mOsm/l). For imaging, slices were transferred to a specialized recording chamber and superfused with normal ACSF (including pharmacological reagents where appropriate) at 22°C.

To identify astrocytes, cells were labeled with sulforhodamine 101 (SR101). To avoid potential issues associated with high levels of SR101 loading (such as induction of seizure like activity <sup>10</sup>), slices were incubated for 20 min in a six-well culture dish containing 1  $\mu$ M SR101 (Sigma-Aldrich) in holding ACSF at 33°C. Next, slices were loaded in a solution containing Fluo4-AM. The dye was supplied as a 50  $\mu$ g ampoule (Thermo Fisher) and was solubilized using a mixture of 7  $\mu$ l dimethyl sulfoxide (DMSO), 2  $\mu$ l 20% Pluronic F-127 (Tocris Biosciences) in DMSO and 1  $\mu$ l 0.5% Kolliphor EL (Sigma-Aldrich) in DMSO. The

ampoule was then incubated at 41°C with constant agitation (1400 RPM) for 15 min using a thermomixer. Concentrated Fluo4-AM was then added to a well containing 3 ml of standard ACSF, giving a final concentration of 15.2  $\mu$ M of Fluo4-AM. Slices were loaded in this solution for 45–60 min at 35°C. At the end of this period, excess AM dye was removed by washing in 20 °C holding ACSF for at least 1 hour prior to imaging.

All functional imaging recordings followed the same protocol. A field of view containing the primary visual cortex was chosen. First, baseline activity was recorded for 60s. Next, (R)-(-)-phenylephrine hydrochloride, 50  $\mu$ M (PHE, Tocris Bioscience) was bath applied. Slices were imaged over a total period of 300 s. Live imaging of cells in acute slices was performed using a two-photon imaging system (VIVO 2-Photon platform, Intelligent Imaging Innovations GmbH), equipped with a tunable multiphoton laser (MaiTai laser, Spectra-Physics). Imaging was performed using a Zeiss Axio Examiner Z1, equipped with a W PlanApochromat 20 $\times$ /NA1.0 objective. To excite both SR101 and Fluo4, the excitation wavelength was tuned to 840 nm. Signals were detected using two fast-gated GaAsP PMTs (Hamamatsu Photosensor Modules H11706), equipped with either a 525/40 nm or 612/69 nm emission filter. The system was further equipped with a 580 nm edge BrightLine® single-edge imaging-flat dichroic beamsplitter (Semrock FF580-FDi01-28x38). Images were 512  $\times$  512 pixels in size and acquired at a frequency between 3 and 3.5 Hz. Acquisition was controlled using Slidebook v.6 software (Intelligent Imaging Innovations GmbH). Laser power was limited to a maximum of 30 mW at the specimen. The focal plane used was usually 30–100  $\mu$ m deep within the slice.

Images were initially processed using Fiji software with standard plugins to correct for image drift and noise. First, a sum projection of all frames was used to generate one image of the SR101 channel, which was then used to draw a region of interest (ROI) surrounding astrocyte cell bodies. The average fluorescence for each ROI per frame of the Fluo4 channel was then measured and exported to MATLAB (The Mathworks). Next, we used custom-written scripts to evaluate the relative variations in intracellular  $\text{Ca}^{2+}$ , estimated as changes in Fluo4 signal relative to the baseline ( $\Delta F/F_0$ ). The baseline ( $F_0$ ) was defined for each ROI to be the average fluorescence before phenylephrine was added to the recording chamber. We calculated the peak amplitude of the response to PHE, as well as the total area under the curve (AUC) of the  $\Delta F/F_0$  trace using custom MATLAB scripts.

### *Multi-electrode array electrophysiology*

LTP recordings were done in littermate  $\alpha$ CamKII<sup>IL-2</sup> and control mice (mixed sex, 2-3 months old), or age-matched female AAV-injected mice (2-3 months old). For tissue preparation, mice were anesthetized with isoflurane and decapitated. Brains were rapidly removed and 300  $\mu$ m thick parasagittal brain slices prepared using a Leica VT1200 vibratome. Slicing was performed in a sucrose-based cutting solution (ACSF) containing (in mM): 87 NaCl, 2.5 KCl, 1.25 NaH<sub>2</sub>PO<sub>4</sub>, 10 glucose, 25 NaHCO<sub>3</sub>, 0.5 CaCl<sub>2</sub>, 7 MgCl<sub>2</sub>, 75 sucrose, 1 kynurenic acid, 5 ascorbic acid, 3 pyruvic acid (pH 7.4 (HCl) ; 95% O<sub>2</sub>/5% CO<sub>2</sub> gas). Slices were allowed to recover at 34°C for 35 min, and then maintained at 20 °C in the same solution for at least 30 min before using. For recordings, slices were placed onto a multielectrode array (MEA 2100, Multi Channel Systems) and continuously perfused with artificial cerebrospinal fluid (aCSF) solution containing (in mM): 119 NaCl, 2.5 KCl, 1 NaH<sub>2</sub>PO<sub>4</sub>, 11 glucose, 26 NaHCO<sub>3</sub>, 4 MgCl<sub>2</sub> and 4 CaCl<sub>2</sub> (pH 7.4 (HCl) ; 95% O<sub>2</sub>/5% CO<sub>2</sub> gas; 34°C). Field excitatory post-synaptic potentials (fEPSPs) were recorded from Schaffer collateral-CA1 synapses by stimulating and recording from the appropriate (visually identified) electrodes. Input-output curves were recorded for each slice by applying single-stimuli ranging from 500 to 2750 mV with 250 mV increments. A stimulus strength that corresponds to 35% of the maximal response in the input-output curve was used for recordings. For long-term potentiation (LTP) experiments, stable fEPSPs were recorded for 30 minutes to establish a baseline. Next, we applied three high frequency trains (100 stimuli; 100 Hz) with 5 minutes intervals. Subsequently, post-LTP fEPSPs were measured every 5 minutes (average of three consecutive stimuli at 15 seconds intervals) for 55 minutes. Recordings were processed and analyzed using Multi Channel Experimenter software (Multi Channel Systems).

## Supplementary references

1. Deacon, R. Assessing burrowing, nest construction, and hoarding in mice. *J Vis Exp*, e2607 (2012).
2. Nadler, J.J. *et al.* Automated apparatus for quantitation of social approach behaviors in mice. *Genes Brain Behav* **3**, 303-314 (2004).
3. Naert, A., Callaerts-Vegh, Z. & D'Hooge, R. Nocturnal hyperactivity, increased social novelty preference and delayed extinction of fear responses in post-weaning socially isolated mice. *Brain Res Bull* **85**, 354-362 (2011).
4. van Boxelaere, M., Clements, J., Callaerts, P., D'Hooge, R. & Callaerts-Vegh, Z. Unpredictable chronic mild stress differentially impairs social and contextual discrimination learning in two inbred mouse strains. *PLoS One* **12**, e0188537 (2017).
5. Callaerts-Vegh, Z. *et al.* Concomitant deficits in working memory and fear extinction are functionally dissociated from reduced anxiety in metabotropic glutamate receptor 7-deficient mice. *J Neurosci* **26**, 6573-6582 (2006).
6. D'Hooge, R. & De Deyn, P.P. Applications of the Morris water maze in the study of learning and memory. *Brain Res Brain Res Rev* **36**, 60-90 (2001).
7. Vorhees, C.V. & Williams, M.T. Morris water maze: procedures for assessing spatial and related forms of learning and memory. *Nat Protoc* **1**, 848-858 (2006).
8. Lueptow, L.M. Novel Object Recognition Test for the Investigation of Learning and Memory in Mice. *J Vis Exp* **126**, 55718 (2017).
9. Ting, J.T. *et al.* Preparation of Acute Brain Slices Using an Optimized N-Methyl-D-glucamine Protective Recovery Method. *J Vis Exp* **132**, 53825 (2018).
10. Rasmussen, R., Nedergaard, M. & Petersen, N.C. Sulforhodamine 101, a widely used astrocyte marker, can induce cortical seizure-like activity at concentrations commonly used. *Sci Rep* **6**, 30433 (2016).

**Supplementary Resources available as:** Liston, Adrian (2021), “Expansion of Treg cells and prevention of pathological neuroinflammation following local delivery of IL-2”, Mendeley Data, V1, doi: 10.17632/24tw36gbcd.1 at <https://data.mendeley.com/datasets/24tw36gbcd/1>

**Supplementary Resource 1. High resolution Treg localization in coronal sections of wildtype and  $\alpha$ CamKII<sup>IL-2</sup> mice.** Healthy perfused mouse brains from wildtype and  $\alpha$ CamKII<sup>IL-2</sup> mice were compared by immunofluorescent confocal imaging. CD4 (green), Foxp3 (red), laminin  $\alpha$ 4 (vascular basement membrane, white) and DAPI (blue). Left, wildtype mouse. Right,  $\alpha$ CamKII<sup>IL-2</sup> mouse. High resolution allows zooming and panning for localization of Treg cells across the entire coronal section.

**Supplementary Resource 2. Code for single-cell RNA-seq analysis for wildtype vs  $\alpha$ CamKII<sup>IL-2</sup> mice.** Code is provided in .pdf and .Rmd formats.

**Supplementary Resource 3. Code for single-cell RNA-seq analysis for PHP.GFAP-GFP- vs PHP.GFAP-IL-2-treated mice.** Code is provided in .pdf and .Rmd formats.

**Supplementary Video 1. CD4 T cells in wildtype brain.** 3D surface rendering of a wildtype perfused brain, stained for CD4 (green), Foxp3 (red), CD31 (white) and DAPI (blue). Representative video of a conventional CD4 T cell and a Treg, in the mid-brain region.

**Supplementary Video 2. Brain Treg cells in  $\alpha$ CamKII<sup>IL-2</sup> brain.** 3D surface rendering of an  $\alpha$ CamKII<sup>IL-2</sup> perfused brain, stained for CD4 (green), Foxp3 (red), CD31 (white) and DAPI (blue). Representative video of a CD4 T cell cluster, consisting of two conventional CD4 T cell and four Treg cells, in the mid-brain region.

**Supplementary Video 3. CD4 T cells in control brain.** 3D surface rendering of a PHP.GFAP-GFP-treated perfused brain, stained for CD4 (green), Foxp3 (red), CD31 (white) and DAPI (blue). Representative video of a conventional CD4 T cell and a Treg, within the mid-brain.

**Supplementary Video 4. Brain Treg cells in PHP.GFAP-IL-2-treated brain.** 3D surface rendering of a PHP.GFAP-IL-2-treated perfused brain, stained for CD4 (green), Foxp3 (red), CD31 (white) and DAPI (blue). Representative video of a CD4 T cell cluster consisting of three Treg cells, in the mid-brain region.

**Supplementary Figure 1: Confocal identification of brain Treg cells in  $\alpha$ CamKII<sup>IL-2</sup> mice.** Healthy perfused mouse brains from wildtype and  $\alpha$ CamKII<sup>IL-2</sup> mice were compared by immunofluorescent confocal imaging. CD4 (green), Foxp3 (red), CD31 (vasculature, white) and DAPI (blue). Single and combined channel representative images of CD4 T cells in the mid-brain, with close-up imaging of identified CD4 T cells. A representative picture of three individual mouse samples is shown (n = 3). Scale bar, 10  $\mu$ m.

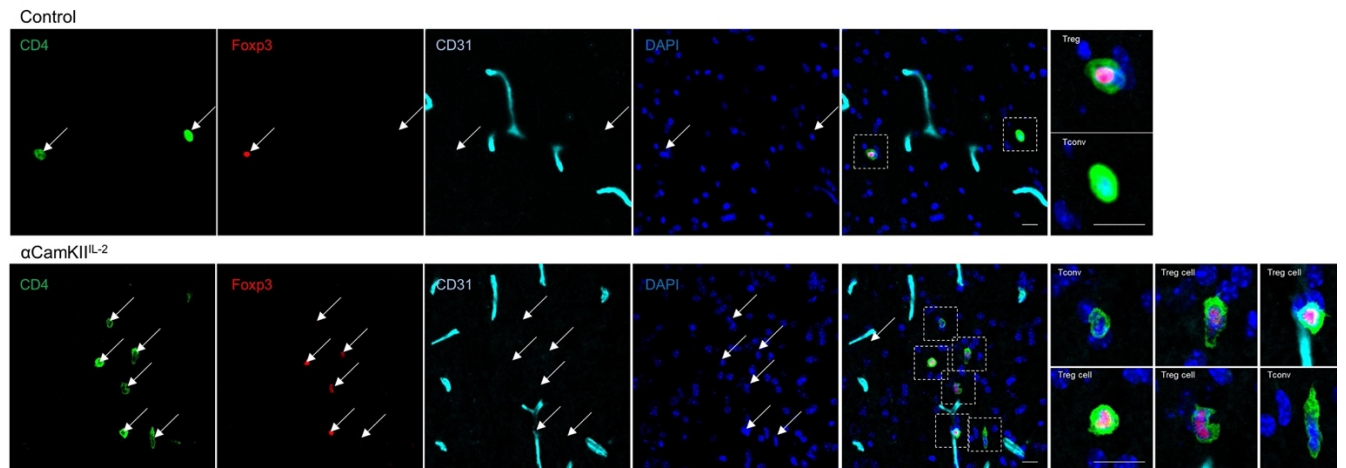

**Supplementary Figure 2: Brain Treg localization in sagittal sections of  $\alpha$ CamKII<sup>IL-2</sup> mice.** Healthy perfused mouse brains from **a** wildtype and **b**  $\alpha$ CamKII<sup>IL-2</sup> mice were compared by immunofluorescent confocal imaging. CD4 (green), Foxp3 (red), CD31 (vasculature, white) and DAPI (blue). Sagittal sections (top) were used to select large brain regions (main image). Arrowheads represent CD4 Tconv cells (blue) and Treg cells (red). Letters indicate selected cells shown in insets. A representative picture of three individual mouse samples is shown (n = 3). Scale bar main image, 100  $\mu$ m. Scale bar insets, 10  $\mu$ m.

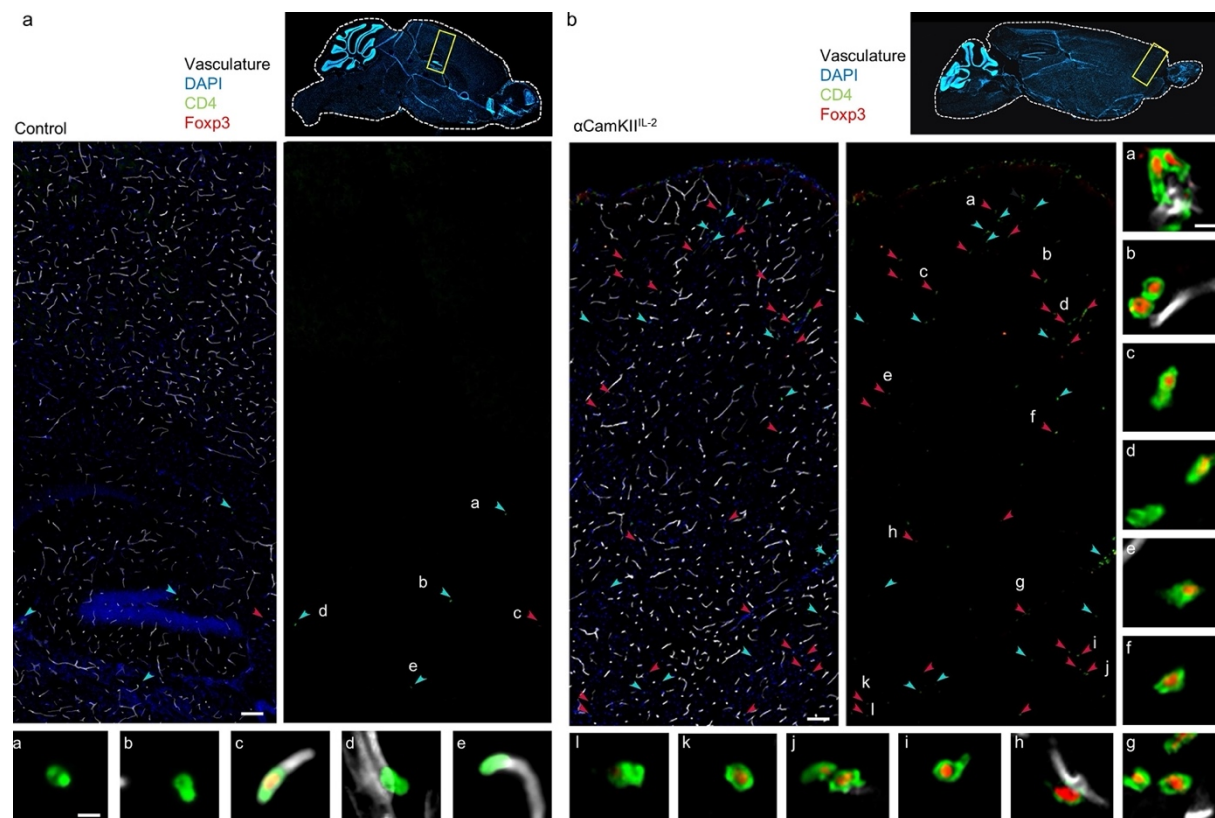



**Supplementary Figure 3: Brain Treg localization in coronal sections of  $\alpha$ CamKII<sup>IL-2</sup> mice.** Healthy perfused mouse brains from **a** wildtype and **b**  $\alpha$ CamKII<sup>IL-2</sup> mice were compared by immunofluorescent confocal imaging. CD4 (green), Foxp3 (red), laminin  $\alpha$ 4 (vascular basement membrane, white) and DAPI (blue). Entire coronal sections (left) were imaged, with the high resolution (single cell level) images available in Supplementary Resource 1. Five representative large regions were selected (middle), with identified CD4 Treg cells in these regions annotated by meningeal/perivascular (orange arrow) versus parenchymal (white arrow) localization. Insets (right) visualize identified cells. A representative picture is shown (n = 3, 1). Scale bar coronal section, 100  $\mu$ m. Scale bar regional image, 100  $\mu$ m. Scale bar insets, 10  $\mu$ m.

A

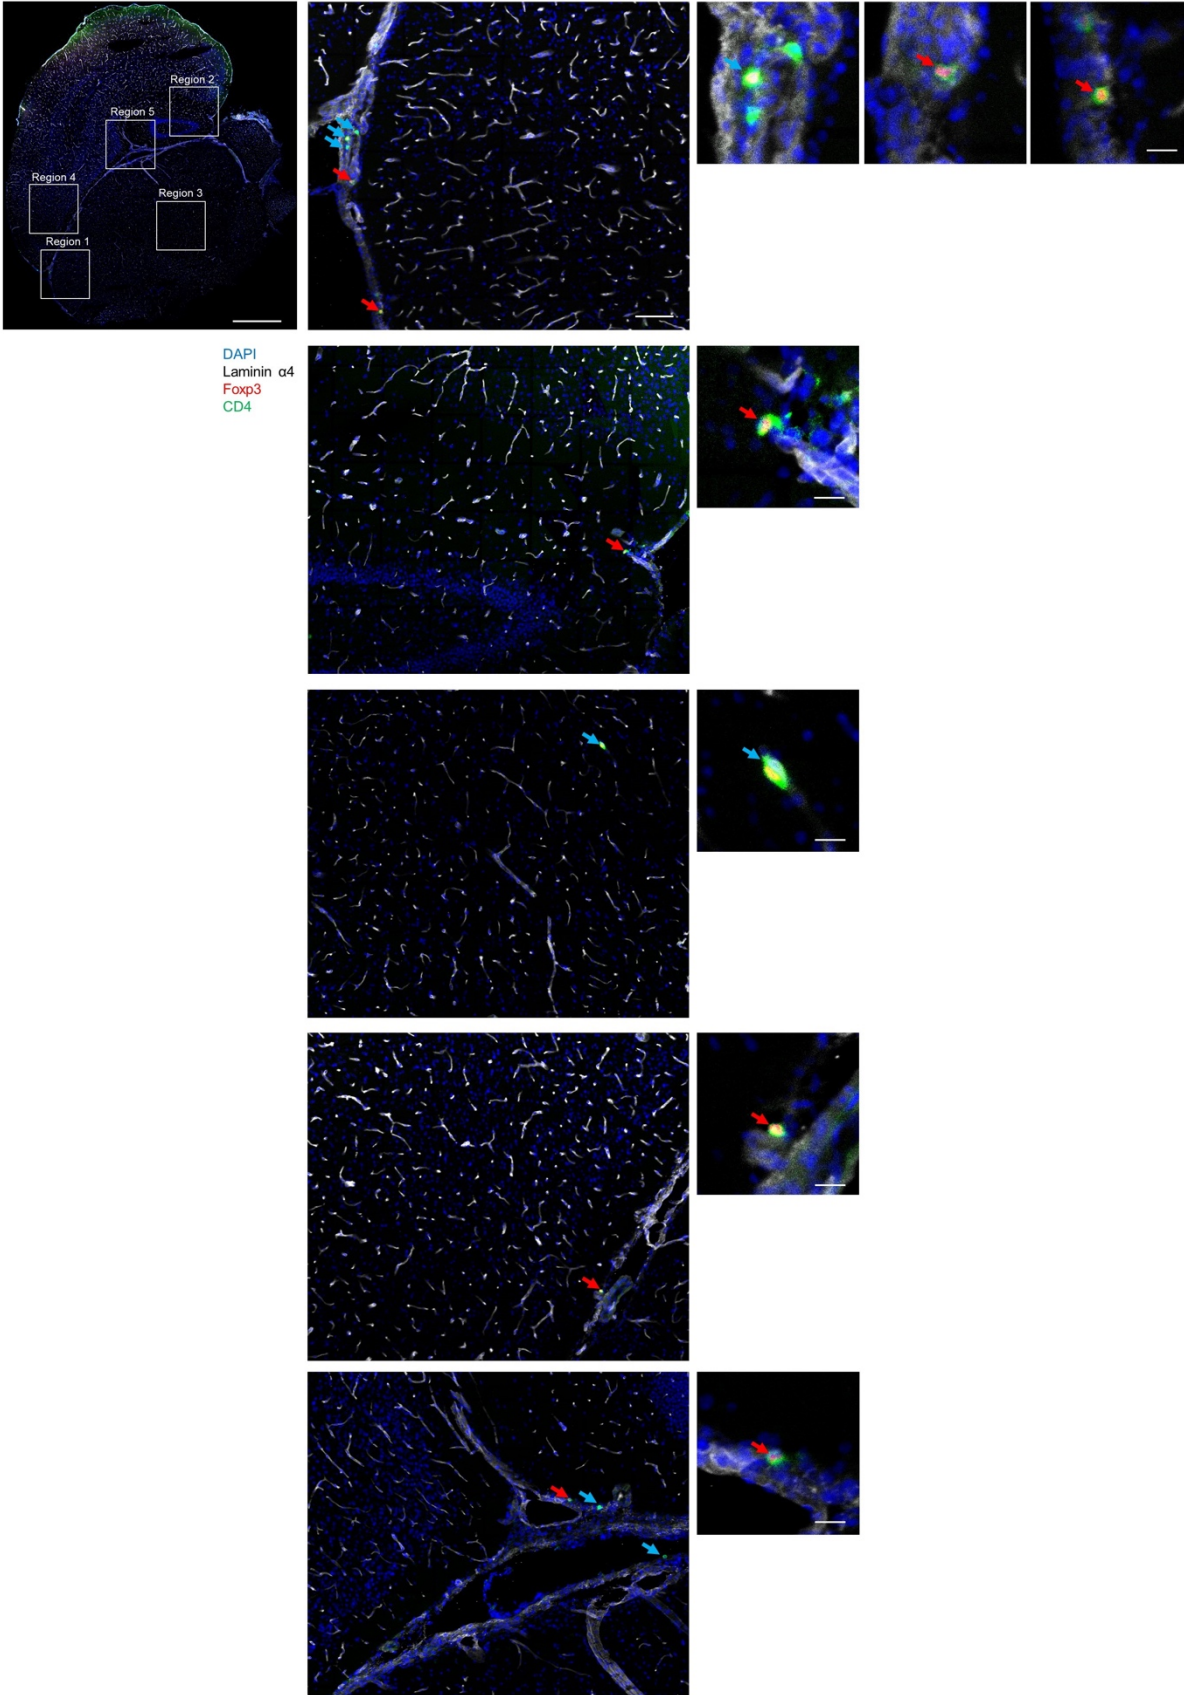

B

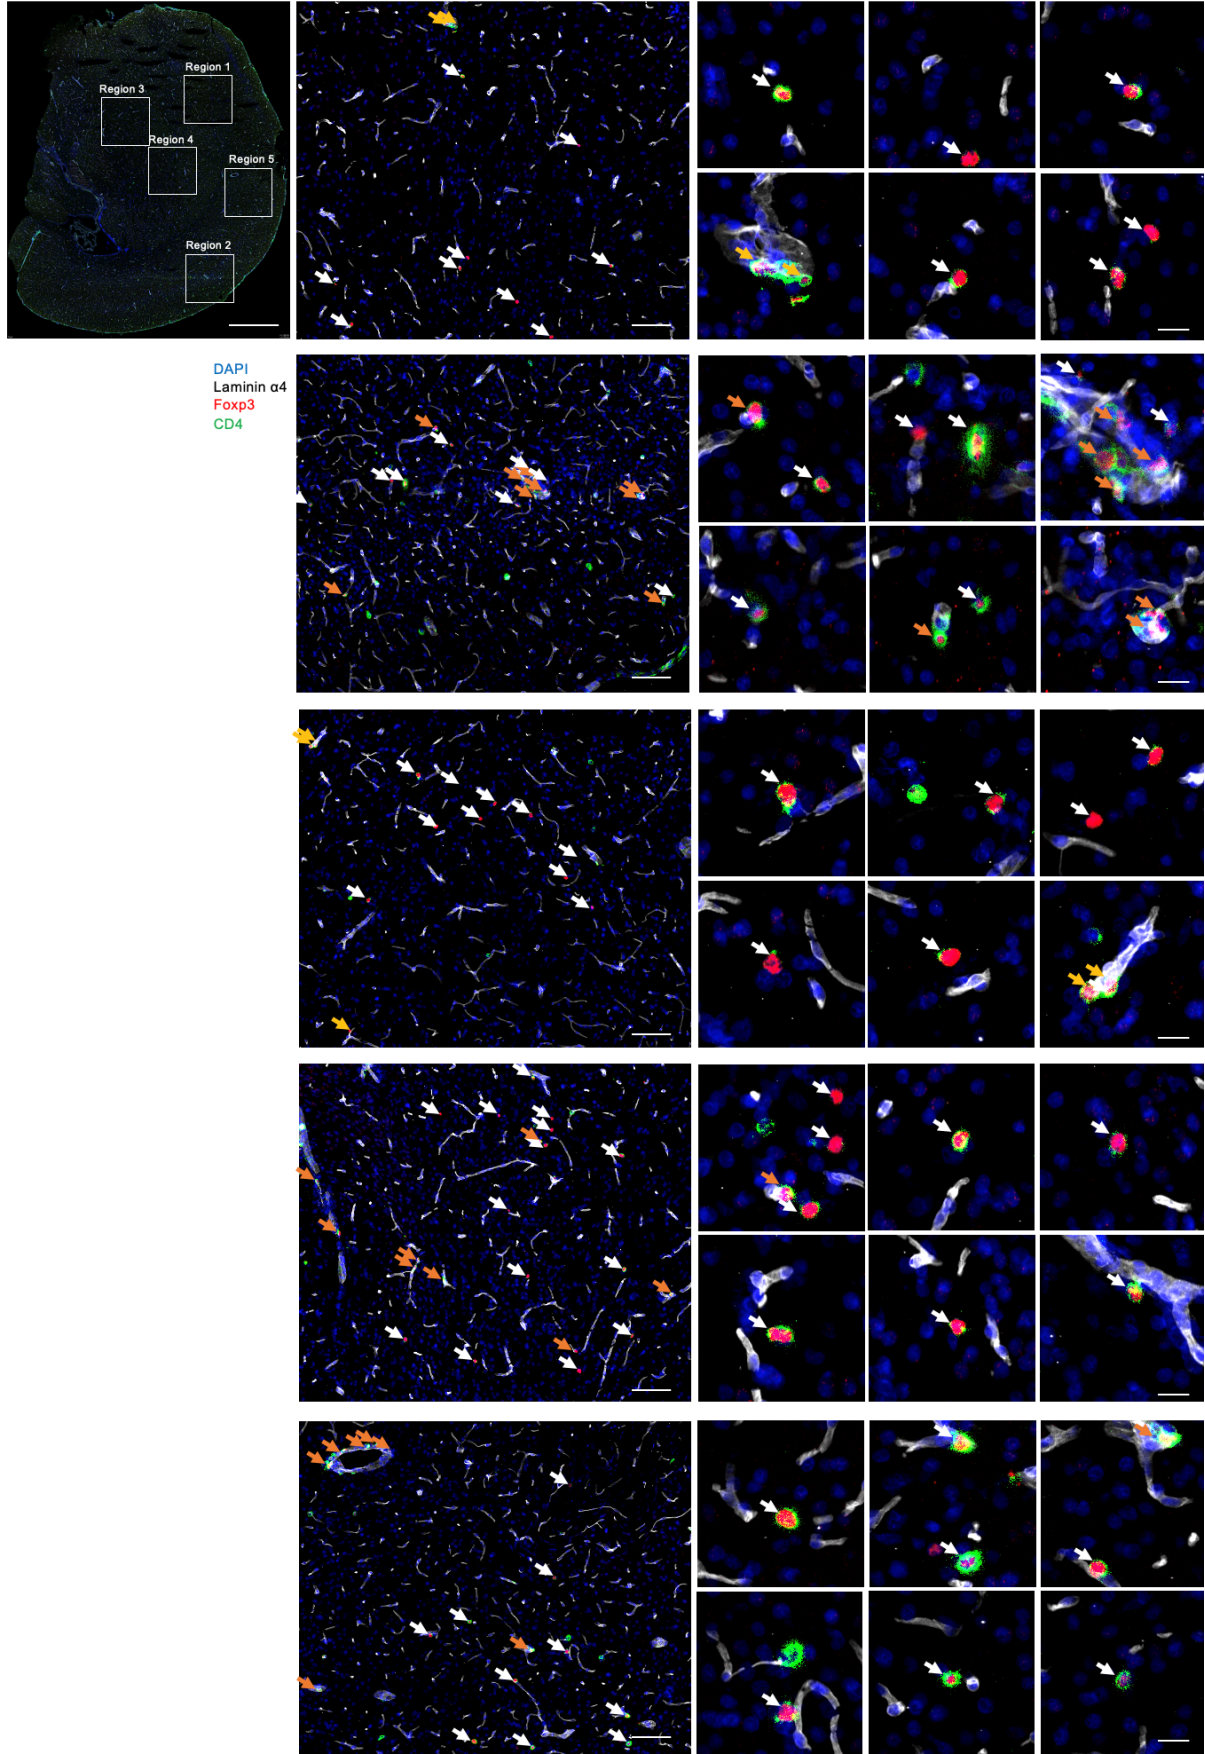

**Supplementary Figure 4: Treg cells in brain regions in  $\alpha$ CamKII<sup>IL-2</sup> mice.** Healthy perfused brain from wildtype and  $\alpha$ CamKII<sup>IL-2</sup> mice was dissected into major regions for flow cytometric analysis of Treg cells (n = 5,3). **a**, Frequency of Treg cells within the CD4 population, and **b**, absolute numbers of Treg cells. Data are displayed as mean  $\pm$  s.e.m.

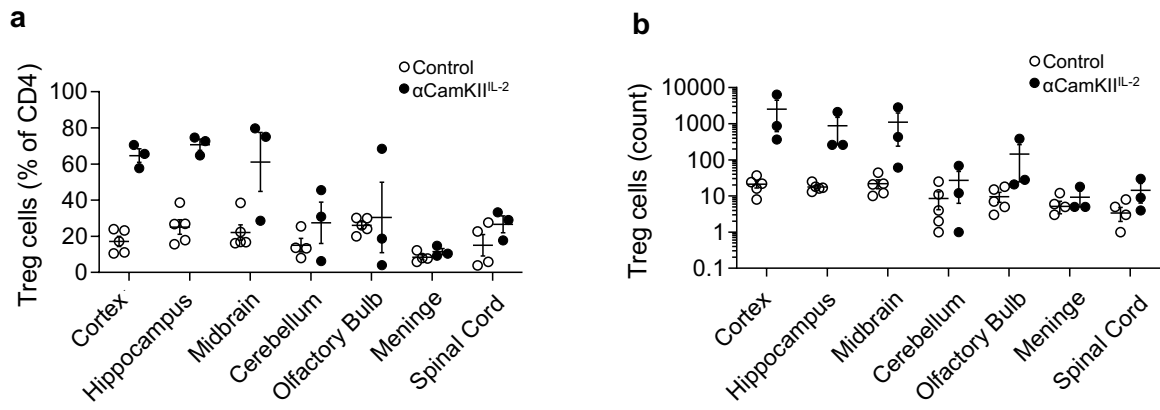

**Supplementary Figure 5: Synthetic expansion of brain regulatory T cells preserves the subset distribution.** Brain CD11b<sup>+</sup> cells, brain CD45<sup>+</sup>CD4<sup>+</sup> cells and blood CD45<sup>+</sup>CD4<sup>+</sup> positive cells were sorted from wildtype or  $\alpha$ CamKII<sup>IL-2</sup> mice for 10X single-cell sequencing (n=2). Data processing and filtering identified 28,590 cells, of which 20,021 were classified as microglia, 6332 were classified as T cells and 2237 were classified as non-target leukocytes. **a**, tSNE projection of the full dataset, with **b** quantification of clusters based on **c** the expression of key lineage markers, visualized as colored single cells on tSNE plots. **d**, clusters containing CD4<sup>+</sup> conventional and regulatory T cells were projected on a tSNE and reclustered, or **e** displayed based on origin from wildtype or  $\alpha$ CamKII<sup>IL-2</sup> mice. **f**, Quantification of clusters as a fraction of cells from each origin, with cluster annotation based on **g** key lineage markers.



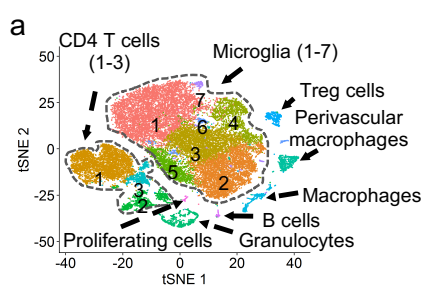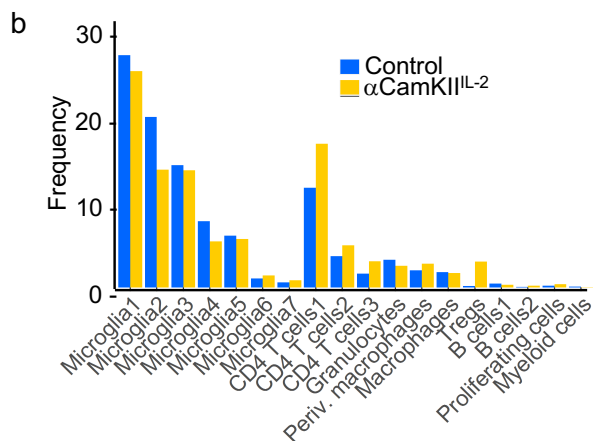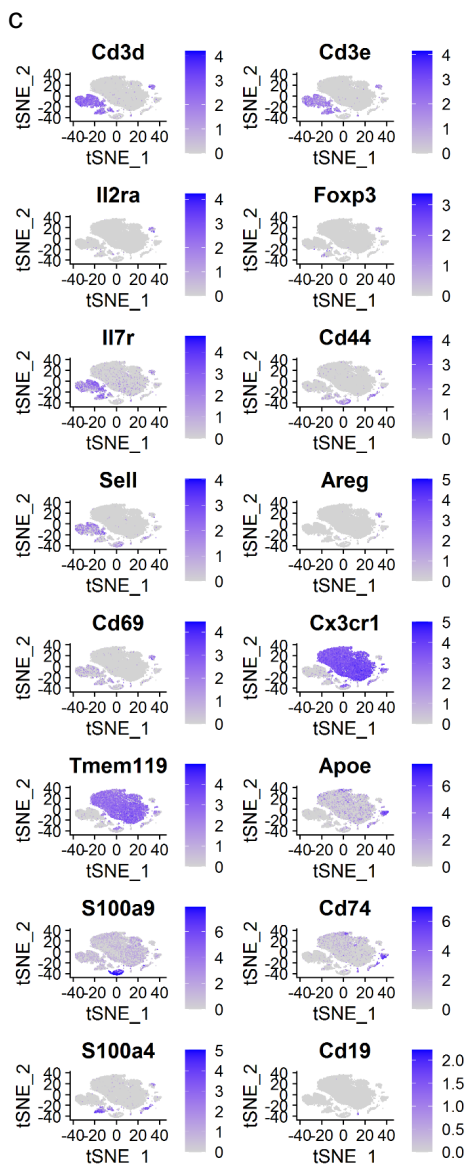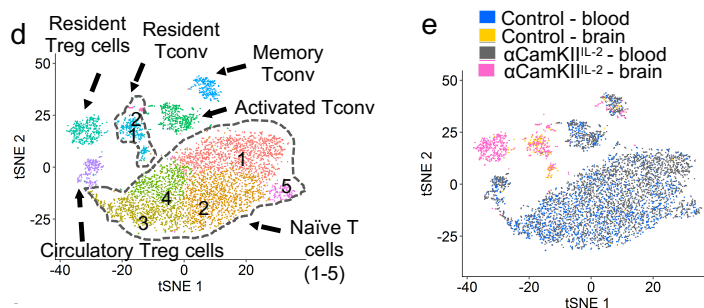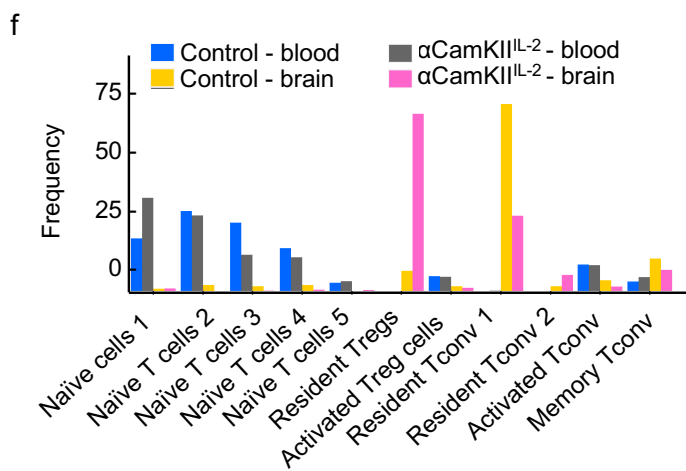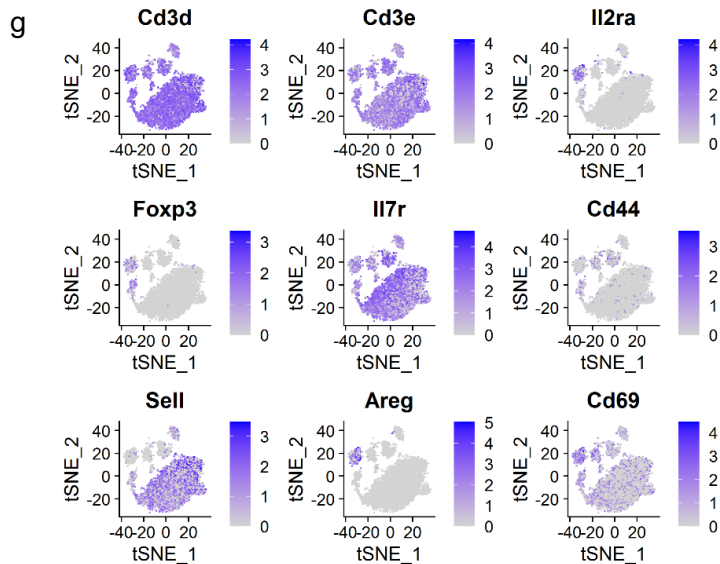

**Supplementary Figure 6: Synthetic expansion of brain regulatory T cells preserves the transcriptional profile.** Brain CD11b<sup>+</sup> cells, brain CD45<sup>+</sup>CD4<sup>+</sup> cells and blood CD45<sup>+</sup>CD4<sup>+</sup> positive cells were sorted from wildtype or  $\alpha$ CamKII<sup>IL-2</sup> mice for 10X single-cell sequencing (n=2). Data processing, filtering and reclustering (as in Supplementary Fig. 5) identified 6332 cells classified as T cells. **a**, Differential gene expression displayed for brain Treg cells from wildtype vs  $\alpha$ CamKII<sup>IL-2</sup> mice, **b** blood Treg cells from wildtype vs  $\alpha$ CamKII<sup>IL-2</sup> mice, **c** brain conventional T cells from wildtype vs  $\alpha$ CamKII<sup>IL-2</sup> mice, **d** blood conventional T cells from wildtype vs  $\alpha$ CamKII<sup>IL-2</sup> mice, or **e** blood vs brain Treg cells. Vertical lines mark fold changes 0.4 and -0.4 and horizontal lines mark the adjusted P value of 0.05. Selected significant changes are annotated. Statistical analyses were performed using Wilcoxon rank sum test to perform differential expression analysis. The P value adjusted is based on Bonferroni correction using all features in the dataset.

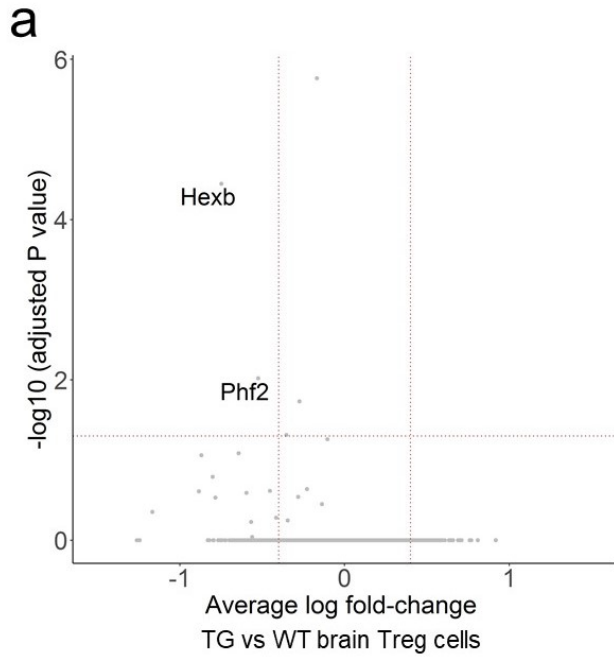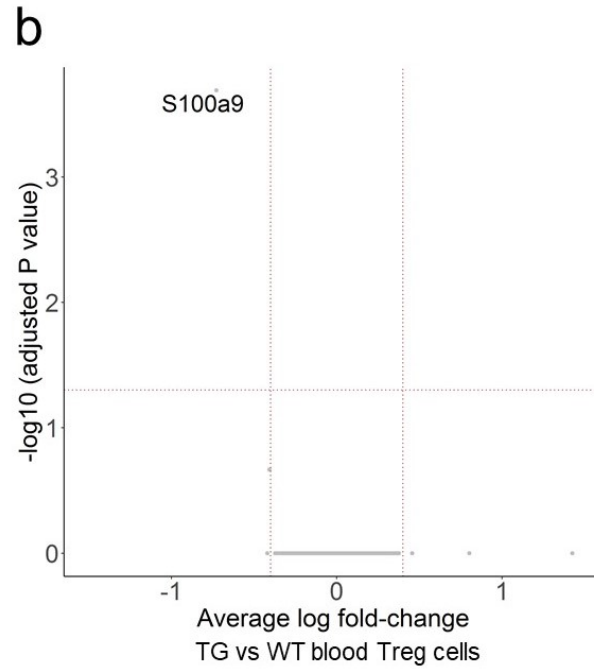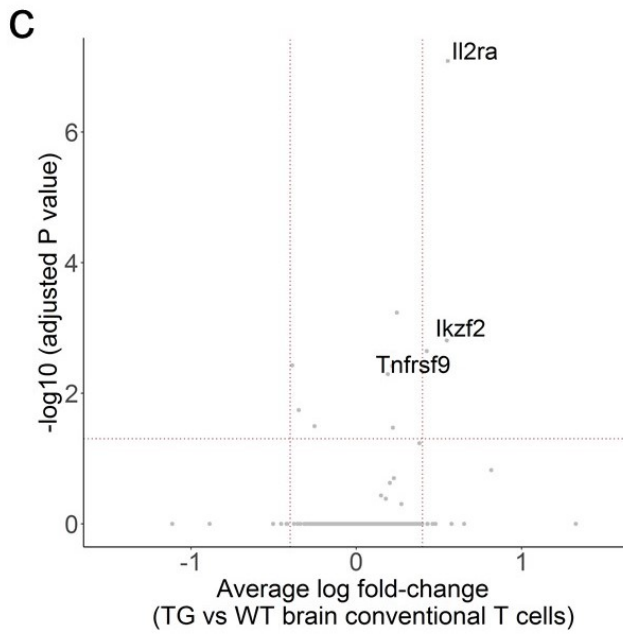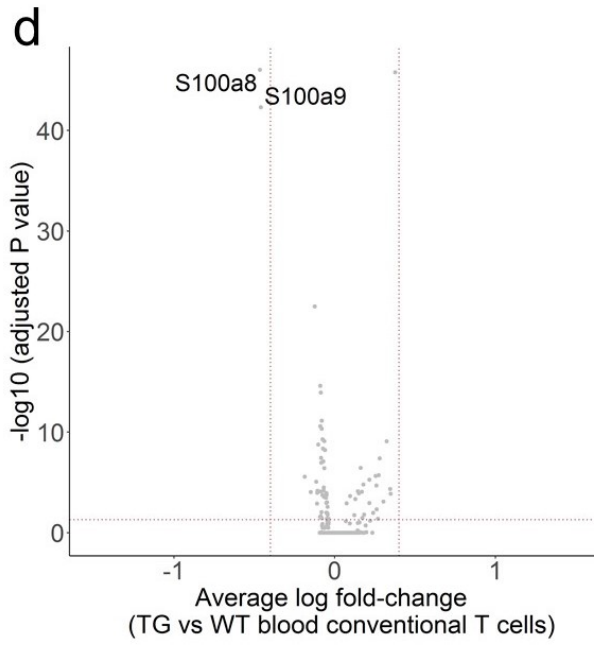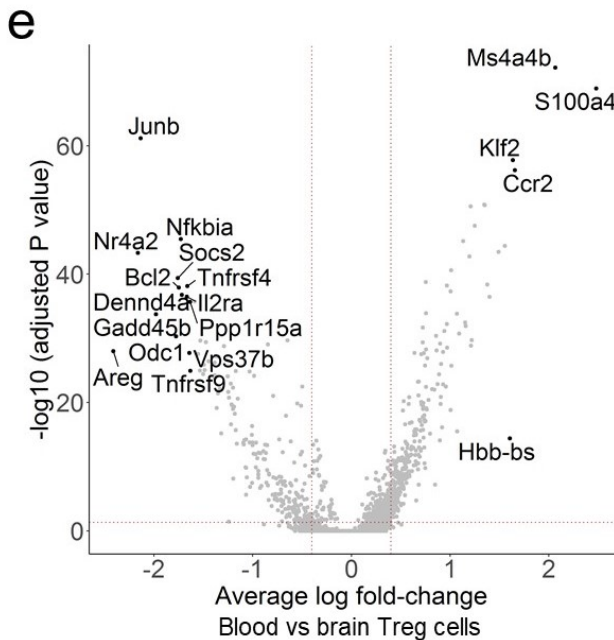



**Supplementary Figure 7: Intact microglial transcriptional signature in  $\alpha$ CamKII<sup>IL-2</sup>**

**mice. a**, tSNE projection of 20,021 microglial cells from wildtype or  $\alpha$ CamKII<sup>IL-2</sup> mice. Following alignment, each cell was grouped into clusters denoted by number and color **b**, tSNE projection of microglial cells labelled as originating from control or  $\alpha$ CamKII<sup>IL-2</sup> mice, with **c** the proportion of cells from control or  $\alpha$ CamKII<sup>IL-2</sup> mice belonging to the identified populations. **d**, Volcano plots showing differentially expressed genes in wildtype vs  $\alpha$ CamKII<sup>IL-2</sup> microglial cells as annotated in panel A. Vertical lines mark fold changes 0.4 and -0.4 and horizontal line mark the adjusted P value of 0.05, genes above these thresholds are annotated. **e**, Visualization of expression of key lineage markers (colored single cells) on tSNE plots. **f**, Microglia from perfused brains of  $\alpha$ CamKII<sup>IL-2</sup> transgenic mice and littermate controls were assessed by high parameter flow cytometry. tSNE of microglia, gated on CD11b<sup>+</sup> CX3CR1<sup>+</sup> CD64<sup>+</sup> CD45<sup>mod</sup> Ly6G<sup>-</sup> (n = 4/group). Microglia clusters, based on FlowSOM expression analysis, were assessed for expression of CD64, MHCII, TGF $\beta$ , LAMP1, CD44, CD69, PDL1, ST2, Ki67, CD80 and IL1 $\beta$  using a heatmap and dendrogram. **g**, Expression of key markers MHCII, PDL1 and CD80 visualized using tSNE projections. **h**, Frequency of expression of MHCII, TNF, TGF $\beta$ , LAMP1, PDL1, Ki67, CD80 and IL1 $\beta$  in control and  $\alpha$ CamKII<sup>IL-2</sup> microglia (n = 6, 11). Mean  $\pm$  s.e.m. Statistical analyses were performed using an unpaired two-tailed Student's t-test with multiple test correction (h). Statistical analyses were performed using Wilcoxon rank sum test to perform differential expression analysis. The P value adjusted is based on Bonferroni correction using all features in the dataset (d).

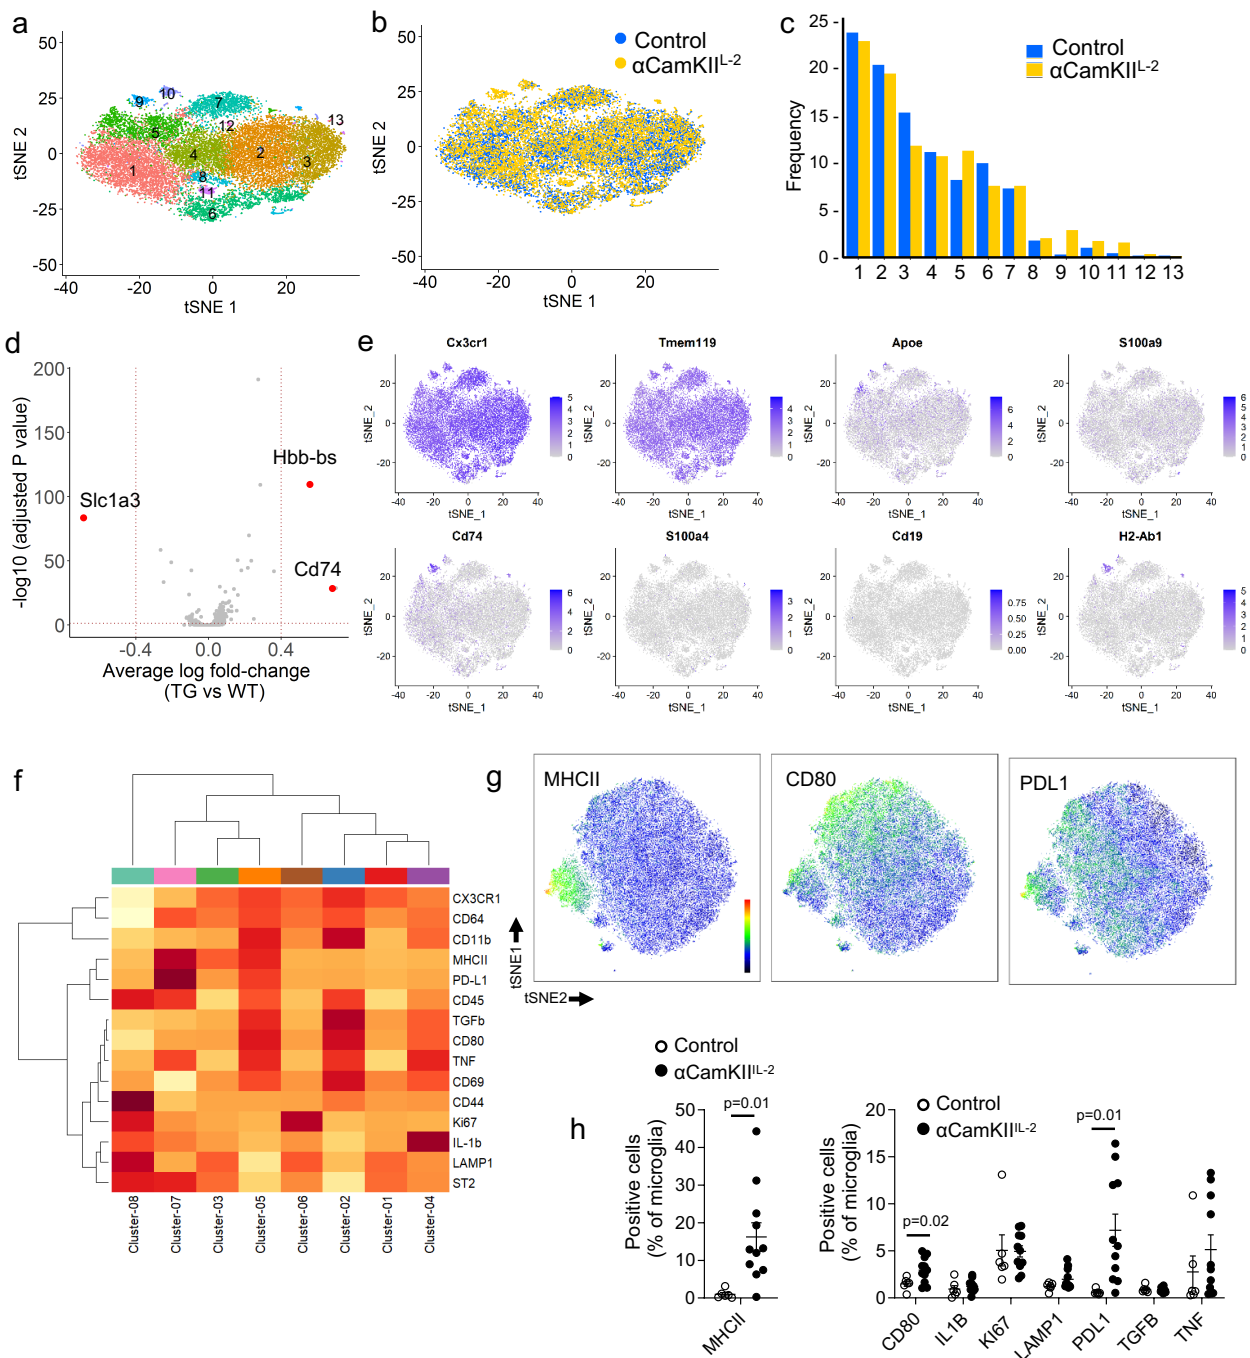

**Supplementary Figure 8: Progressive neurological damage following traumatic brain injury.** Controlled cortical impact was performed to induce moderate TBI, with examination on days 1, 2, 3 and 7 post-TBI (n = 3, 3, 1, 3). **a**, Macroscopic damage to the surface of the brain at the injury site, representative photo. Scale bar, 0.5 cm. **b**, Representative immunofluorescence staining of the cortical tissue after controlled cortical impact. GFAP (astrocytes), Iba1 (microglia), DAPI (nuclei). Scale bars, 500  $\mu$ m. **c**, Measure of total integrated GFAP intensity in the cortical area adjacent to the impact site at 1, 2, 3 and 7 days post-TBI. Mean  $\pm$  s.e.m.

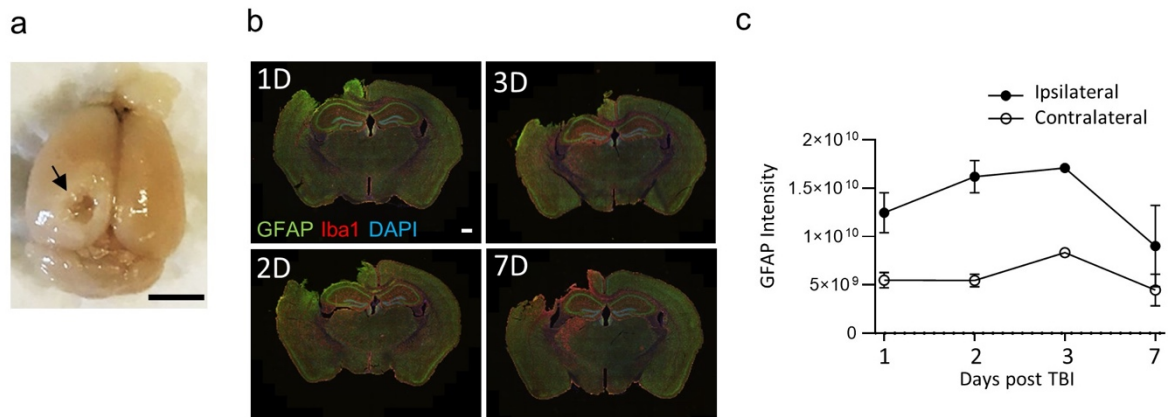

**Supplementary Figure 9: Normal peripheral influx following traumatic brain injury in  $\alpha$ CamKII<sup>IL-2</sup> mice.** Control (wildtype) littermates and  $\alpha$ CamKII<sup>IL-2</sup> mice were tamoxifen-treated at 6 weeks, and controlled cortical impacts to induce moderate TBI were given at 12 weeks. Mice were examined at 15 days post-TBI (n=4,4). TBI-induced perfused brains from littermate control and  $\alpha$ CamKII<sup>IL-2</sup> mice were compared by high-dimensional flow cytometry. **a**, Absolute number of CD4, Treg cells, CD8 and  $\gamma\delta$  T cells. **b**, Expression of CD25, CD44, CD69, Ki67 and PDL1 markers, or **c**, amphiregulin (Areg), IL10 and IL17 within the CD4 conventional T cell population. **d**, Expression of CD25, CD44, CD69, Ki67 and PDL1 markers, or **e** amphiregulin, IL10 and IL17 within the Treg population. Mean  $\pm$  s.e.m. Statistical analyses were performed using a non-parametric Mann–Whitney U-test.

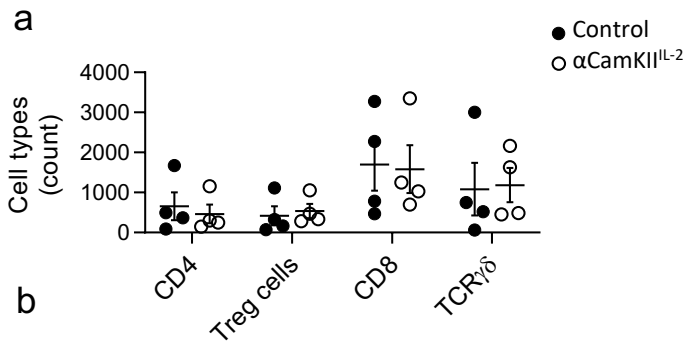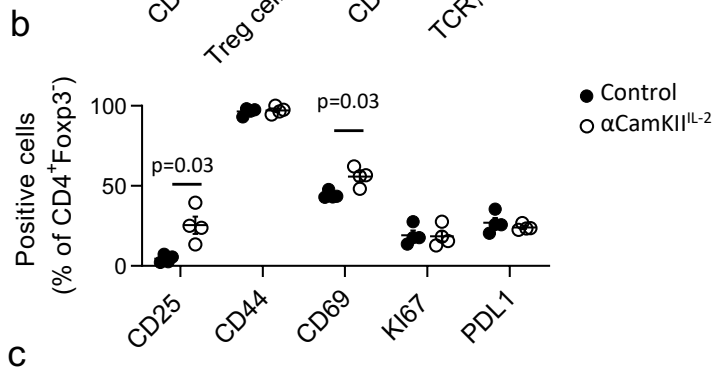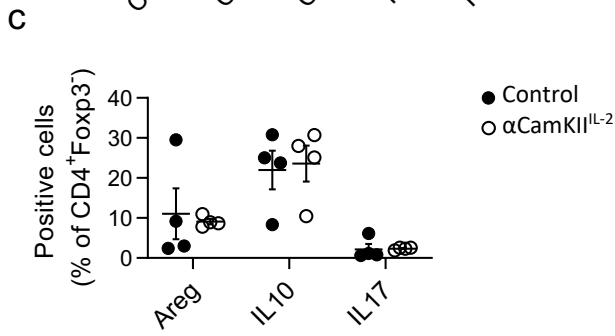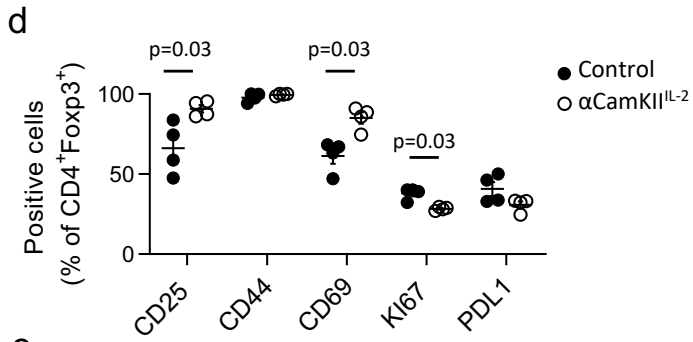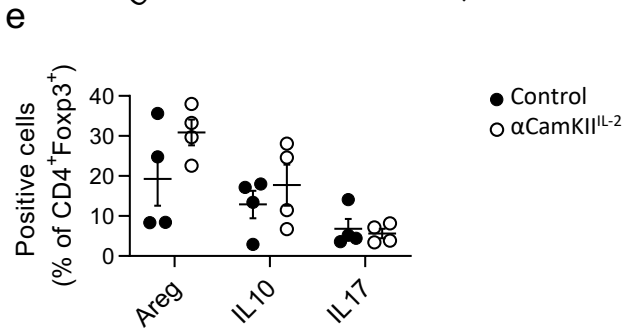

**Supplementary Figure 10: Confocal identification of brain Treg cells in PHP.*GFAP*-IL-2-treated mice.** Healthy perfused mouse brains from wildtype mice treated with PHP.*GFAP*-GFP or PHP.*GFAP*-IL-2 were compared by immunofluorescent confocal imaging. CD4 (green), Foxp3 (red), CD31 (white) and DAPI (blue). Single and combined channel representative images of CD4 T cells in the mid-brain, with close-up imaging of identified CD4 T cells. A representative picture of three individual mouse samples is shown. Scale bar, 10  $\mu$ m.

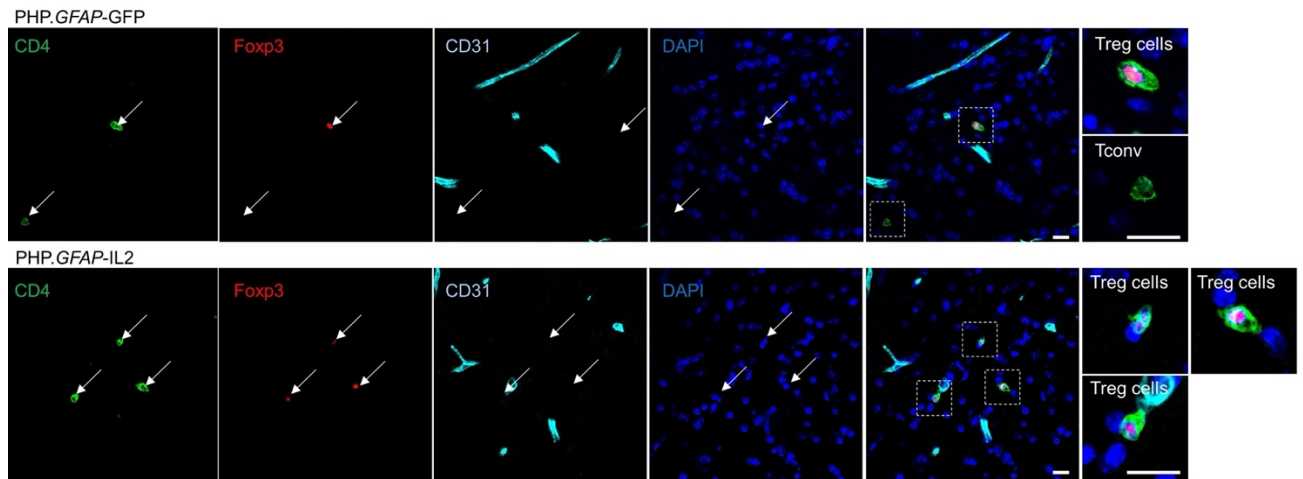

**Supplementary Figure 11: Off-target effects of PHP.GFAP-IL-2 treatment are not observed.** **a**, Healthy perfused brain, spleen and blood from PHP.GFAP-GFP control and PHP.GFAP-IL-2-treated mice were compared by high-dimensional flow cytometry (n = 3, 5). tSNE plots of leukocytes built on lineage markers (CD4, CD8, NK1.1, CD44, CD62L, CD69, CD25, Foxp3) with quantification of major populations. **b**, Absolute numbers of key leukocyte populations. **c**, tSNEs of brain CD4 conventional T cells built on key markers (CD62L, CD44, CD103, CD69, CD25, PD-1, Nrp1, ICOS, KLRG1, ST2, Ki67, CTLA4). Colors indicate annotated FlowSOM clusters, with quantification and **d** frequency of marker expression. **e**, tSNEs of brain CD8 T cells built on key markers (CD62L, CD44, CD103, CD69, CD25, PD-1, Nrp1, ICOS, KLRG1, ST2, Ki67, CTLA4). Colors indicate annotated FlowSOM clusters, with quantification and **f** frequency of marker expression. **g**, tSNEs of brain NK cells built on key markers (CD62L, CD44, CD103, CD69, CD25, PD-1, Nrp1, ICOS, KLRG1, ST2, Ki67, CTLA4). Colors indicate annotated FlowSOM clusters, with quantification and **h** frequency of marker expression. **i**, tSNEs of brain Treg cells built on key markers (CD62L, CD44, CD103, CD69, CD25, PD-1, Nrp1, ICOS, KLRG1, ST2, Ki67, CTLA4). Colors indicate annotated FlowSOM clusters, with quantification and **j** frequency of marker expression. Mean  $\pm$  s.e.m. Statistical analyses were performed using an unpaired two-tailed Student's t-test. tSNE plots are compared using cross entropy tests.

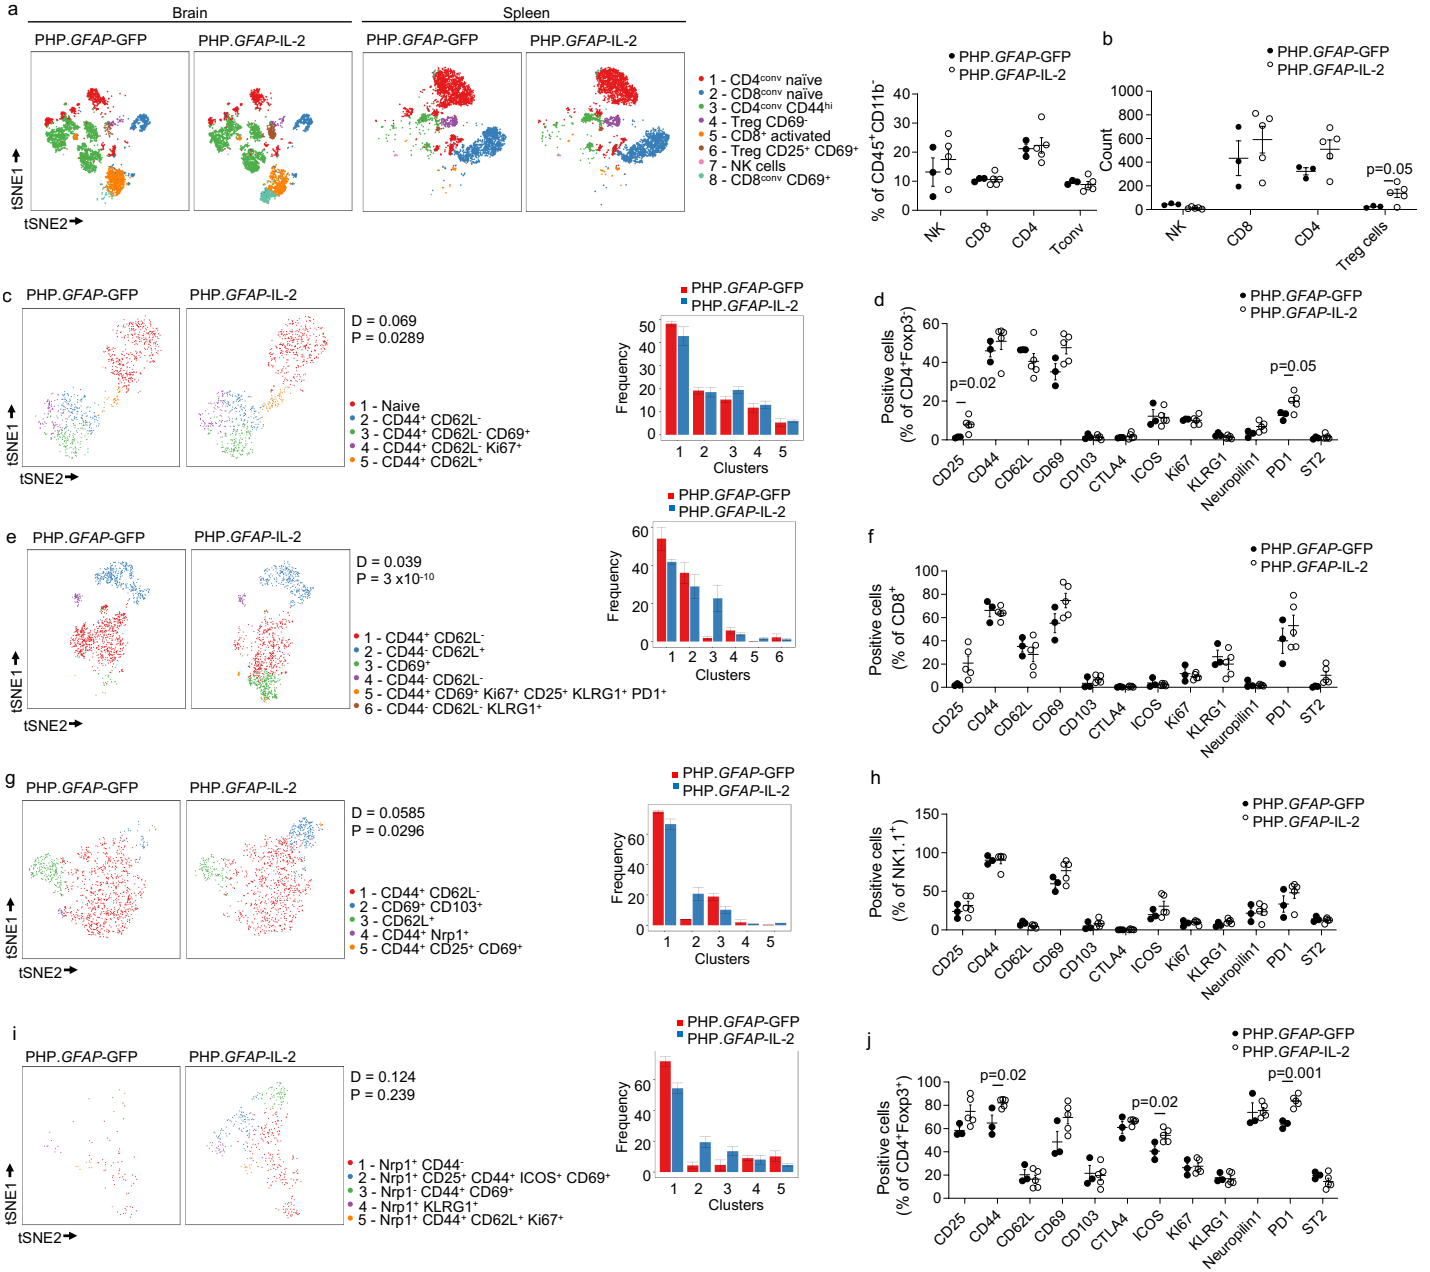



**Supplementary Figure 12: Normal peripheral influx following PHP.*GFAP*-IL-2 treatment in traumatic brain injury mice.** Mice treated with PHP.*GFAP*-GFP control or PHP.*GFAP*-IL-2 (day -14) were given controlled cortical impacts to induce moderate TBI and examined at 15 days post-TBI (n = 3, 4, 4); a sham TBI was included in the PHP.*GFAP*-GFP group. Perfused brains from sham, TBI and PHP.*GFAP*-IL-2-treated TBI mice were compared by high-dimensional flow cytometry. **a**, Absolute number of microglia, gated as CD11b<sup>+</sup> CX3CR1<sup>+</sup> CD64<sup>+</sup> CD45<sup>mod</sup> Ly6G<sup>-</sup> cells. **b**, CD8 and CD4 T cells, as a proportion of CD45<sup>+</sup>CD11b<sup>-</sup> cells. **c**, Absolute number of Treg cells, CD4 Tconv and CD8 T cells. **d**, Frequency of CD25, CD44, CD69, Ki67 and PDL1 expressing-cells, and **e** frequency or **f** mean fluorescence intensity (MFI) of amphiregulin (Areg)-producing cells within the CD4 conventional T cell population. **g**, Frequency of CD25, CD44, CD69, Ki67 and PDL1 expressing-cells, and **h** frequency of IL-10 or Areg-producing cells, within the CD4 conventional T cell population. **i**, Mean expression of Areg, in Areg-producing CD4 conventional T cells. **j**, Representative histograms for CD25, CD44, CD69, Ki67, PDL1, IL-10 and Areg in CD4 conventional T cells, or **k** Treg cells, from sham, TBI and PHP.*GFAP*-IL-2-treated TBI mice. **l**, Mice treated with PHP.*GFAP*-GFP control or PHP.*GFAP*-IL-2 (day -14) were given controlled cortical impacts to induce moderate TBI and examined at 15 days post-TBI (n = 5/group). Superficial cervical lymph nodes were assessed for the percentage of CD4, CD8 and  $\gamma\delta$  T cells within the T cell compartment, and **m** Treg cells within the CD4 T cell compartment, **n** with calculation of absolute numbers. **o**, Cervical lymph nodes were assessed for the percentage of CD4, CD8 and  $\gamma\delta$  T cells within the T cell compartment, and **p** Treg cells within the CD4 T cell compartment, **q** with calculation of absolute numbers. Data are displayed as mean  $\pm$  s.e.m. (**a – i, l – q**).

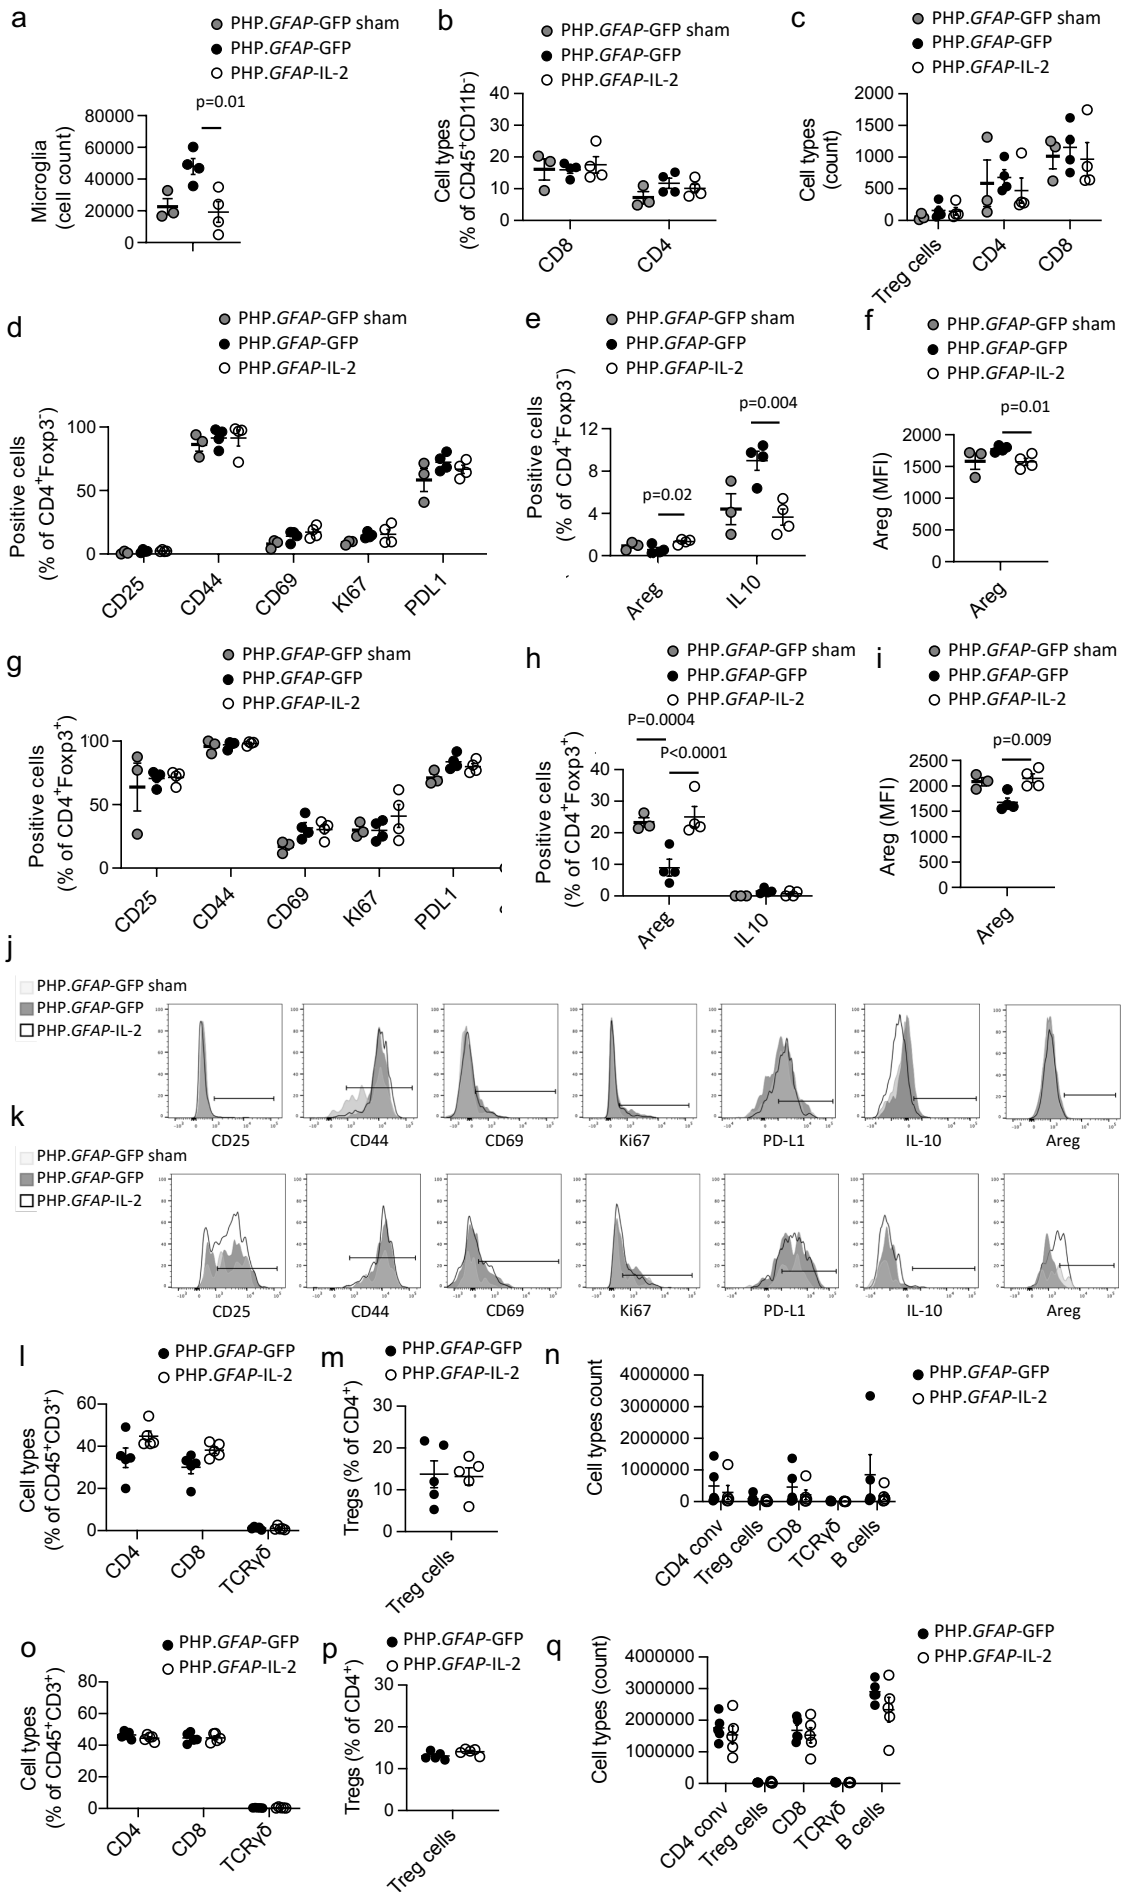

**Supplementary Figure 13: Normal peripheral influx during distal middle cerebral artery occlusion following PHP.*GFAP*-IL-2 treatment.** Mice treated with PHP.*GFAP*-GFP control or PHP.*GFAP*-IL-2 (day -14) were subject to dMCAO and examined at day 14 (n = 3, 5, 2). Perfused brains were compared by high-dimensional flow cytometry. **a**, Absolute number of microglia, gated as CD11b<sup>+</sup> CX3CR1<sup>+</sup> CD64<sup>+</sup> CD45<sup>mod</sup> Ly6G<sup>-</sup> cells. **b**, Frequency of CD4, CD8 and  $\gamma\delta$  T cells within CD45<sup>+</sup> cells, and **c** frequency of Treg cells within CD4<sup>+</sup> T cells. **d**, Absolute numbers of CD4 Tconv, Treg cells CD8, and  $\gamma\delta$  T cells. **e**, Expression of CD25, CD44, CD69, Ki67 and PDL1 markers, or **f** amphiregulin (Areg), IL10 and IL17 within the CD4 conventional T cell population. **g**, Expression of CD25, CD44, CD69, Ki67 and PDL1 markers, or **h** Areg, IL10 and IL17 within the Treg population. **i**, Superficial cervical lymph nodes were assessed for the frequency of CD4 Tconv, Treg cells, CD8, Treg, B cells and  $\gamma\delta$  T cells within the CD45<sup>+</sup> cell population, with **j** absolute numbers. Mean  $\pm$  s.e.m.

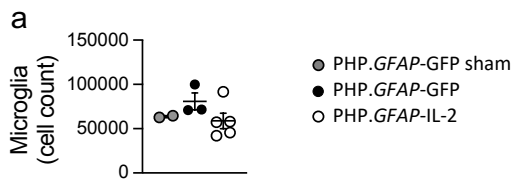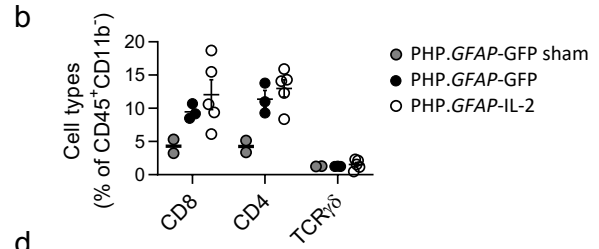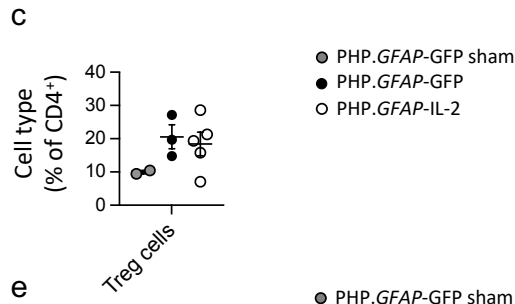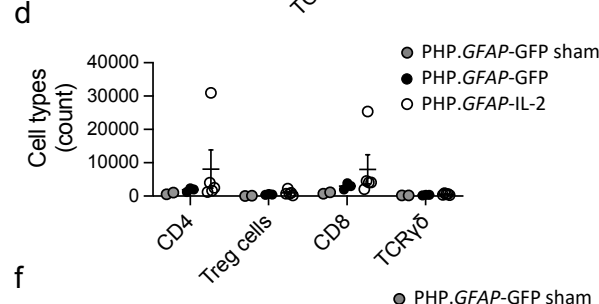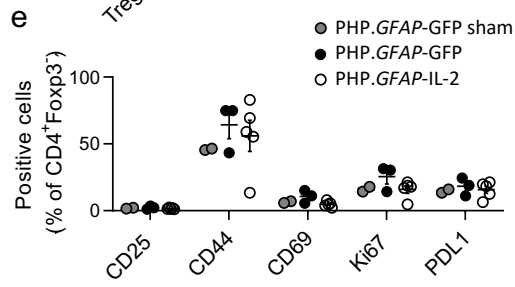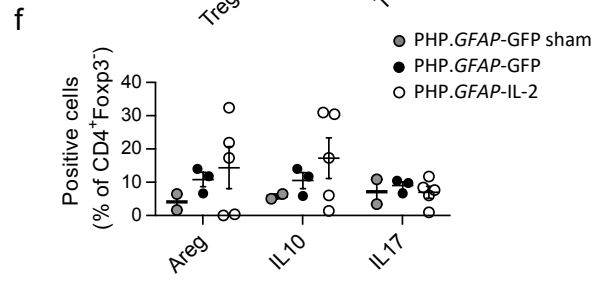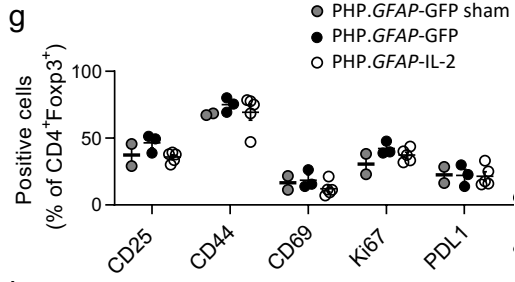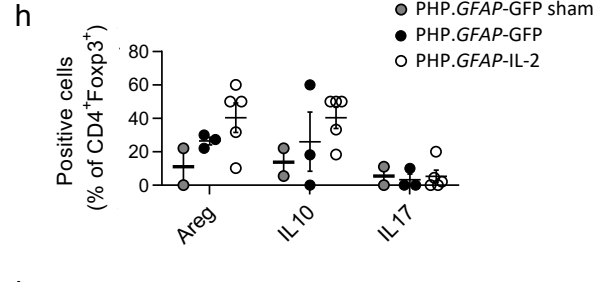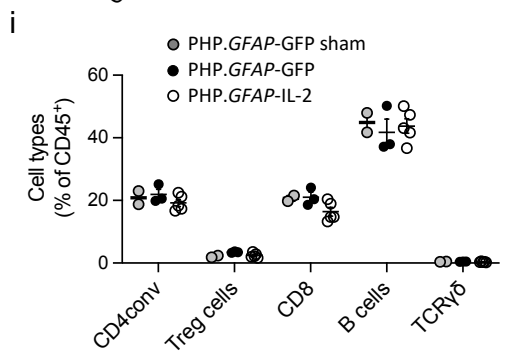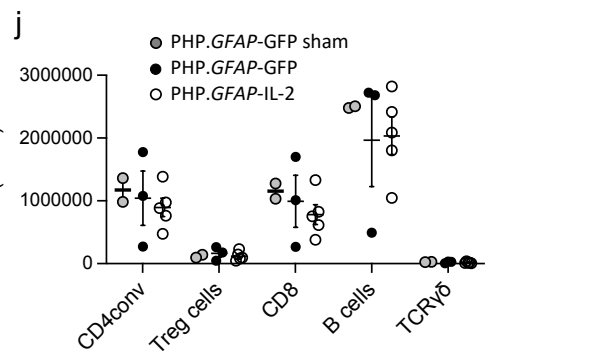

**Supplementary Figure 14: Normal peripheral influx during photothrombotic stroke following PHP.GFAP-IL-2 treatment.** Mice treated with PHP.GFAP-GFP control or PHP.GFAP-IL-2 (day -14) were induced with a photothrombotic stroke and examined at day 1 (n = 3, 6, 6). Perfused brains were compared by high-dimensional flow cytometry. **a**, Absolute number of microglia, gated as CD11b<sup>+</sup> CX3CR1<sup>+</sup> CD64<sup>+</sup> CD45<sup>mod</sup> Ly6G<sup>-</sup> cells. **b**, Frequency of CD4, CD8 and  $\gamma\delta$  T cells within CD45<sup>+</sup> cells, and **c** frequency of Treg cells within CD4<sup>+</sup> T cells. **d**, Absolute numbers of CD4 Tconv, Treg cells, CD8, and  $\gamma\delta$  T cells. **e**, Expression of CD25, CD44, CD69 and Ki67 markers, or **f** amphiregulin (Areg), IL10 and IL17 within the CD4 conventional T cell population. **g**, Expression of CD25, CD44, CD69 and Ki67 markers, or **h** Areg, IL10 and IL17 within the Treg population. Mean  $\pm$  s.e.m.

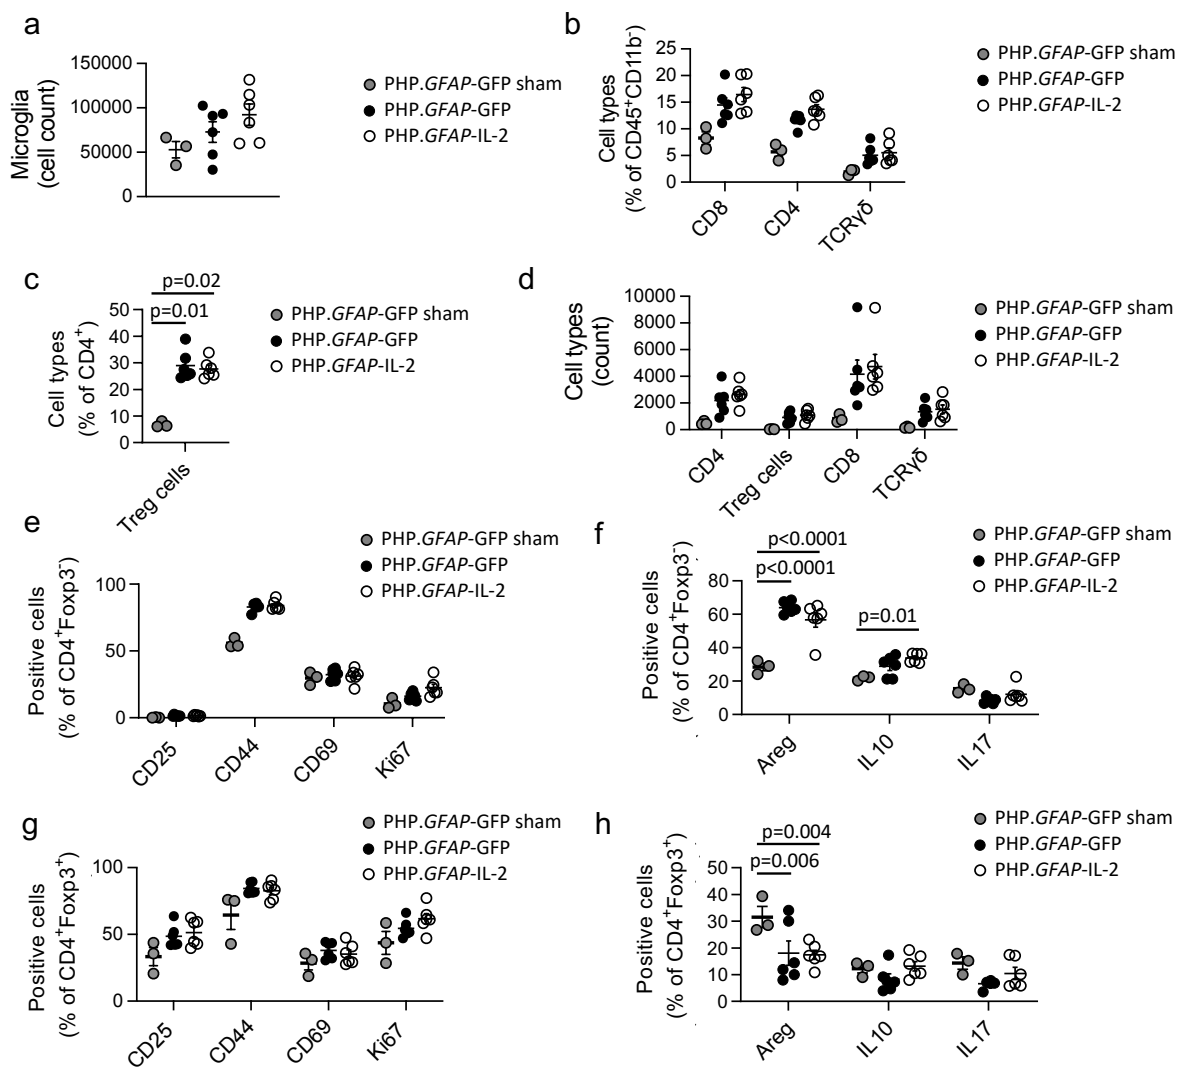

**Supplementary Figure 15: Normal peripheral influx during experimental autoimmune encephalomyelitis following PHP.GFAP-IL-2 treatment.** Mice treated with PHP.GFAP-GFP control or PHP.GFAP-IL-2 (day -14) were induced with experimental autoimmune encephalomyelitis (EAE) and examined at days 15, 21 and 30. Perfused CNS was compared by high-dimensional flow cytometry. **a**, Frequency of CD8 T cells (n = 5 D0; 5,5 D15; 10,10 D21; 7, 6 D30) and **b** CD4 T cells within CD45<sup>+</sup> cells (n = 5 D0; 5,5 D15; 10,10 D21; 7, 6 D30), and **c** frequency of Treg cells within CD4<sup>+</sup> T cells (n = 5 D0; 5,5 D15; 10,10 D21; 7, 6 D30). **d**, Absolute number of CD8 T cells (n = 5 D0; 5,5 D15; 10,10 D21; 7, 6 D30), **e** CD4 T cells (n = 5 D0; 5,5 D15; 10,10 D21; 7, 6 D30) and **f** Treg cells (n = 5 D0; 5,5 D15; 10,10 D21; 7, 6 D30). **g**, Frequency of CD25, CD44, CD62L, CD69, CD103, CTLA4, GITR, Helios, ICOS, Ki67, KLRG1, Neuropilin1, PD1 and Tbet expression within the CNS-resident Treg population on day 15 (n = 6, 5), **h** day 21 (n = 6, 5) or **i** day 30 (n = 7, 6). **j**, IL10 (n = 5, 5 D15 and D21; 7,5 D30) and **k** amphiregulin (Areg) expression within CNS-resident Treg cells (n = 5,5). **l**, IL17 (n = 5, 5 D15 and D21; 7,5 D30), **m** IFN $\gamma$  (n = 5,5), **n** GM-CSF (n = 5, 5 D15 and D21; 7,5 D30), **o** TNF $\alpha$  (n = 5, 5 D15 and D21; 7,5 D30), **p** IL-2 (n = 5, 5 D15 and D21; 6,5 D30) and **q** IFN $\gamma$ -TNF $\alpha$  cytokine expression within the CNS-resident Tconv population at various times post-EAE induction (n = 5,5). **r**, 15 days post-induction, major leukocyte subsets were assessed by flow cytometry in the superficial cervical lymph nodes (n = 5,5) and **s** the deep cervical lymph nodes (n = 5,5). **t**, Absolute numbers of major leukocyte subsets in the superficial and **u** deep cervical lymph nodes (n=5,5). Mean  $\pm$  s.e.m. Statistical analyses were performed using an unpaired two-tailed Student's t-test.

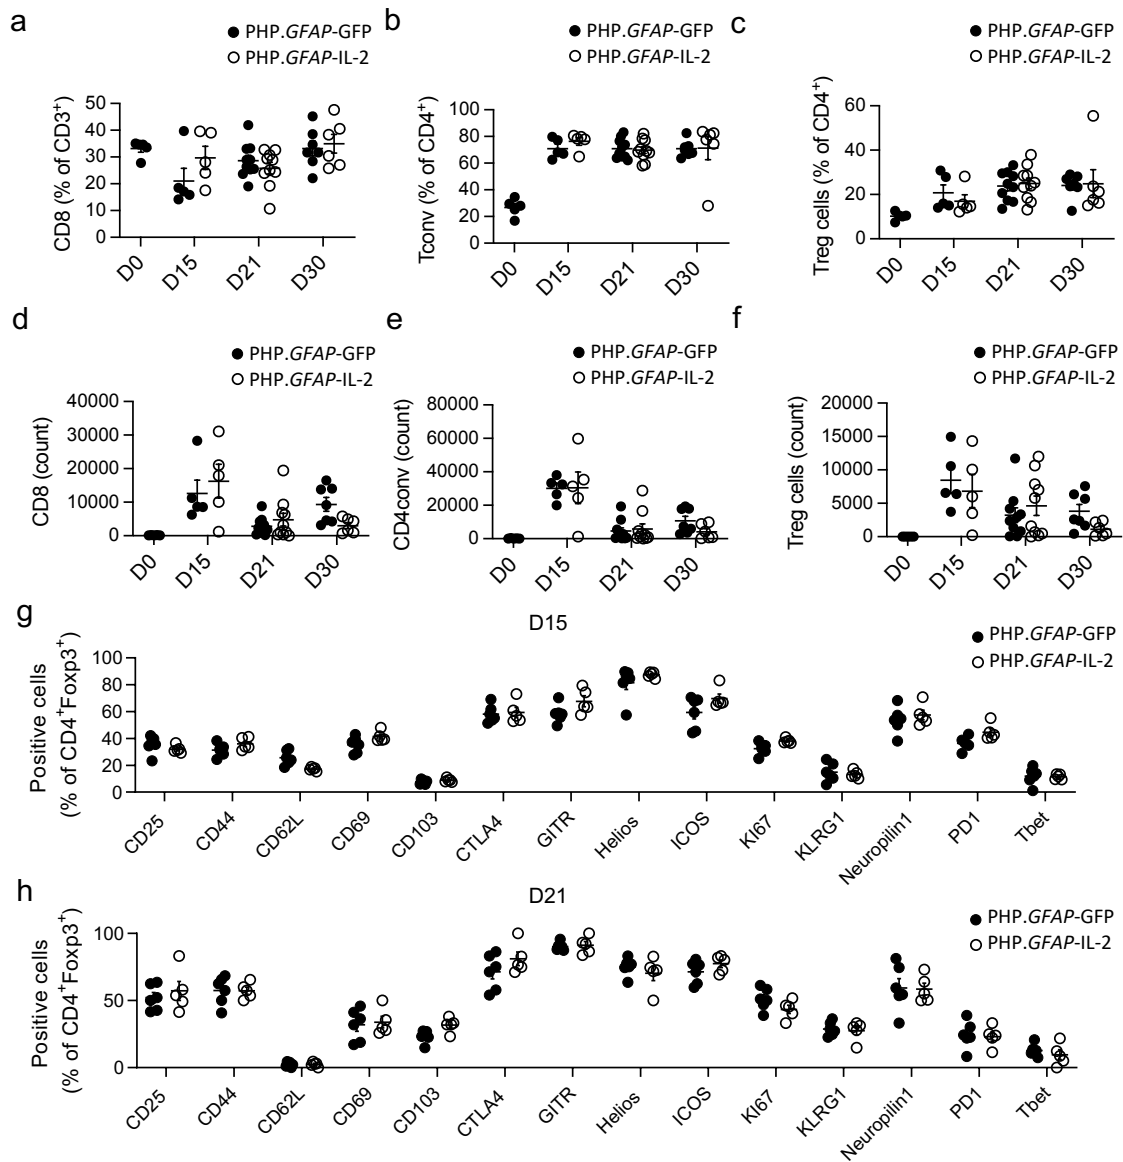

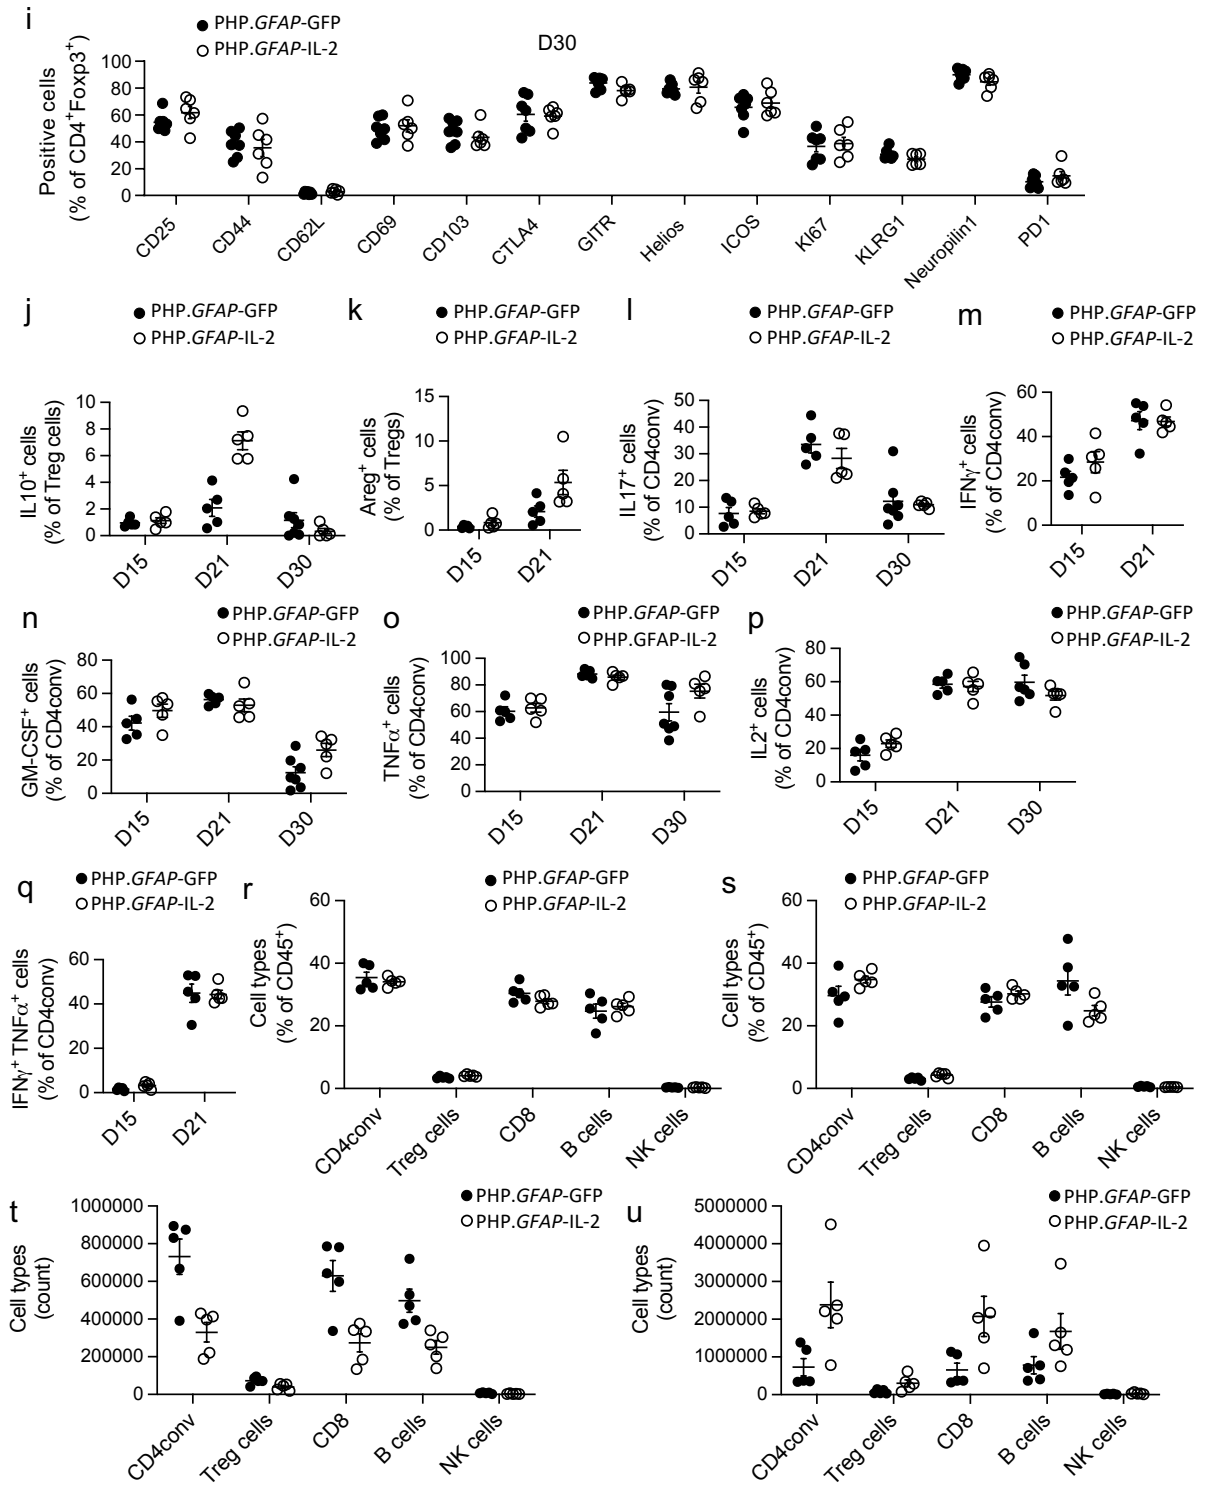



**Supplementary Figure 16: Gating strategy for analyzing Treg cells from the brain.**  
Representative gating strategy used to quantify Treg cell numbers in the brain using flow cytometry.

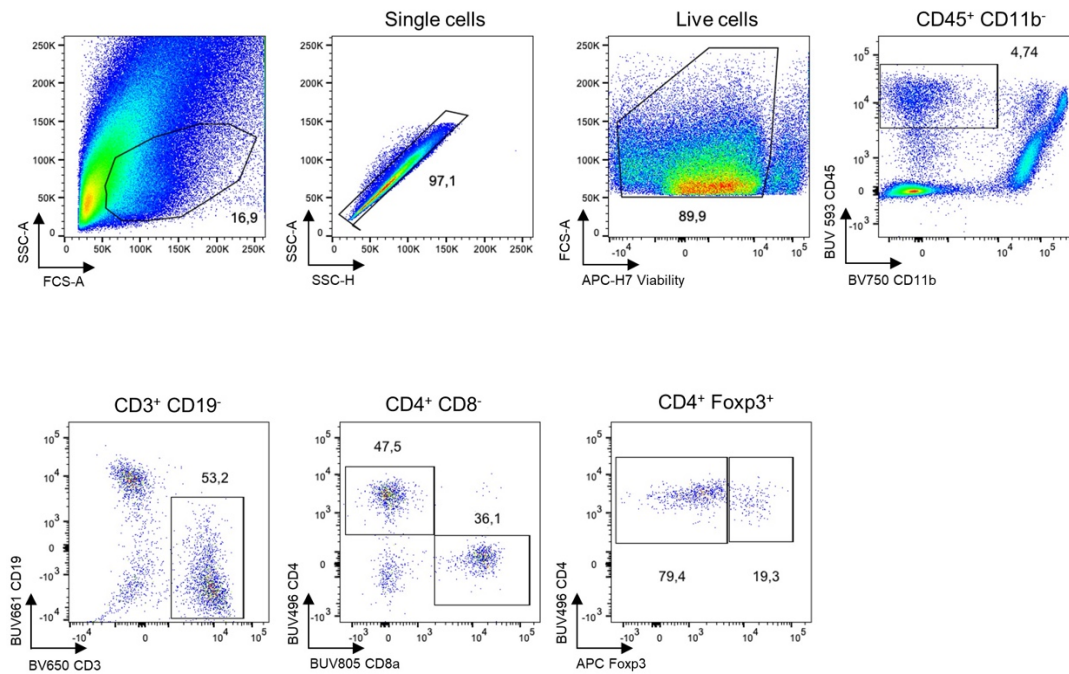

## Source data for supplementary figures

**Supplementary Figure 4a**

|      |      | CONTROL |      |      |      | αCamKII IL-2 |      |      |  |
|------|------|---------|------|------|------|--------------|------|------|--|
| CTX  | 23,9 | 23,3    | 10,5 | 11,1 | 17,1 | 70,6         | 65,6 | 57,7 |  |
| HIPP | 26,9 | 26,7    | 17,9 | 38,6 | 15,6 | 74,7         | 72,7 | 64,7 |  |
| Mb   | 16,9 | 22,4    | 38,5 | 16,2 | 16,8 | 28,6         | 79,8 | 75   |  |
| Crb  | 25,5 | 8       | 13,6 | 13,3 |      | 6,25         | 45,5 | 30,8 |  |
| Ob   | 26,1 | 24,1    | 30,2 | 30   | 20   | 18,7         | 68,5 | 4,05 |  |
| Men  |      | 7,94    | 5,88 | 7,64 | 12,2 | 9,3          | 14,8 | 10,4 |  |
| Sc   | 27,6 | 5,88    |      | 22,7 | 3,9  | 29           | 17,7 | 33,3 |  |

**Supplementary Figure 4b**

|      |    | CONTROL |    |    |    | αCamKII IL-2 |      |     |  |
|------|----|---------|----|----|----|--------------|------|-----|--|
| CTX  | 37 | 24      | 16 | 8  | 22 | 6419         | 364  | 861 |  |
| HIPP | 18 | 13      | 25 | 17 | 16 | 260          | 2122 | 258 |  |
| Mb   | 44 | 22      | 10 | 12 | 21 | 61           | 2845 | 433 |  |
| Crb  | 25 | 2       | 11 | 4  | 1  | 1            | 68   | 12  |  |
| Ob   | 18 | 7       | 15 | 3  | 5  | 21           | 386  | 28  |  |
| Men  | 0  | 5       | 3  | 12 | 6  | 5            | 18   | 5   |  |
| Sc   | 8  | 1       | 0  | 5  | 3  | 9            | 30   | 4   |  |

**Supplementary Figure 7h**

|       | Control |      |      |      |      |      |      | $\alpha$ CamKII IL-2 |      |      |      |      |      |      |      |      |      |
|-------|---------|------|------|------|------|------|------|----------------------|------|------|------|------|------|------|------|------|------|
| CD80  | 1,78    | 1,57 | 1,34 | 1,57 | 0,38 | 2,35 | 3,41 | 2,96                 | 4,69 | 1,67 | 4,96 | 3,35 | 2,61 | 2,46 | 4,34 | 1,09 | 1,04 |
| IL1B  | 0,76    | 1,38 | 2,48 | 0,37 | 0,03 | 0,63 | 2,45 | 1,26                 | 1,52 | 2,24 | 0,12 | 0,86 | 0,9  | 1,56 | 0,96 | 0,73 | 0,87 |
| KI67  | 4,71    | 3,41 | 1,97 | 3,8  | 3,3  | 13,1 | 7,65 | 2,37                 | 3,84 | 3,41 | 7,57 | 5,44 | 6,65 | 5,03 | 6,61 | 3,77 | 2,08 |
| LAMP1 | 0,47    | 1,39 | 1,25 | 1,49 | 1,12 | 1,64 | 1,24 | 1,19                 | 1,25 | 1,1  | 4,12 | 1,39 | 2,21 | 3,45 | 3,09 | 1,31 | 1,53 |
| MHCII | 0,08    | 0,77 | 0,26 | 0,61 | 1,15 | 3,14 | 13,2 | 6,27                 | 7,42 | 0,28 | 44,3 | 12,9 | 19,3 | 22,5 | 31,2 | 8,96 | 12   |
| PDL1  | 0,39    | 0,51 | 0,52 | 0,57 | 0,5  | 1,13 | 4,43 | 1,98                 | 1,78 | 0,53 | 12   | 3,16 | 12,2 | 16,4 | 15   | 6,18 | 5,52 |
| TGFB  | 1,61    | 0,72 | 0,84 | 0,62 | 0,92 | 0,75 | 1,32 | 0,92                 | 1,3  | 0,89 | 0,62 | 1,13 | 0,69 | 0,8  | 0,61 | 0,48 | 0,93 |
| TNF   | 0,28    | 0,37 | 0,75 | 0,7  | 3,59 | 10,9 | 0,48 | 0,41                 | 1,12 | 0,52 | 1,87 | 3,03 | 8,88 | 12,6 | 13,3 | 10,9 | 3,5  |

**Supplementary Figure 8**

| hours | IPSI     |          |          | Contra   |          |          |
|-------|----------|----------|----------|----------|----------|----------|
| 24    | 1,35E+10 | 8,49E+09 | 1,54E+10 | 7E+09    | 4,37E+09 | 5,09E+09 |
| 48    | 1,3E+10  | 1,87E+10 | 1,68E+10 | 4,4E+09  | 6,67E+09 | 5,35E+09 |
| 72    | 1,71E+10 |          |          | 8,34E+09 |          |          |
| 168   | 9,13E+09 | 1,68E+09 | 1,63E+10 | 1,53E+09 | 4,62E+09 | 7,25E+09 |

Supplementary Figure 9 a

|       |      | CONTROL |      |     |      | αCamKII IL-2 |      |      |  |
|-------|------|---------|------|-----|------|--------------|------|------|--|
| CD4   | 496  | 372     | 1676 | 88  | 152  | 254          | 1160 | 298  |  |
| Tregs | 328  | 164     | 1114 | 68  | 474  | 284          | 1056 | 332  |  |
| CD8   | 2276 | 786     | 3272 | 470 | 1254 | 700          | 3350 | 1032 |  |
| TCRγδ | 518  | 746     | 3008 | 64  | 1634 | 456          | 2164 | 488  |  |

Supplementary Figure 9 b

|      |      | CONTROL |      |      |      | αCamKII IL-2 |      |      |  |
|------|------|---------|------|------|------|--------------|------|------|--|
| CD25 | 5,65 | 2,69    | 7,4  | 2,27 | 39,5 | 25,2         | 23,8 | 13,4 |  |
| CD44 | 97,6 | 96,8    | 98,2 | 93,2 | 94,7 | 100          | 97,6 | 96,6 |  |
| CD69 | 43,1 | 43,5    | 42,8 | 47,7 | 56,6 | 62,2         | 56   | 48,3 |  |
| KI67 | 17,7 | 17,7    | 27,7 | 13,6 | 18,4 | 27,6         | 15,5 | 12,8 |  |
| PDL1 | 35,5 | 25,8    | 25,9 | 20,5 | 23,7 | 26,8         | 22,6 | 23,5 |  |

Supplementary Figure 9 c

|      |      | CONTROL |      |      |      | αCamKII IL-2 |      |      |  |
|------|------|---------|------|------|------|--------------|------|------|--|
| Areg | 3,04 | 2,41    | 9,2  | 29,5 | 8,66 | 8,9          | 11   | 7,87 |  |
| IL10 | 25   | 30,8    | 23,8 | 8,33 | 25,1 | 28           | 30,7 | 10,5 |  |
| IL17 | 1,14 | 0,8     | 6,13 | 0,64 | 2,6  | 1,93         | 2,33 | 2,62 |  |

Supplementary Figure 9 d

|      |      | CONTROL |      |      |      | αCamKII IL-2 |      |      |  |
|------|------|---------|------|------|------|--------------|------|------|--|
| CD25 | 74,4 | 47,6    | 83,8 | 58,8 | 95,4 | 87,3         | 94,3 | 86,1 |  |
| CD44 | 100  | 97,6    | 99,8 | 94,1 | 100  | 98,6         | 99,6 | 100  |  |
| CD69 | 68,3 | 67,1    | 63,2 | 47,1 | 91,1 | 88,7         | 86   | 74,7 |  |
| KI67 | 39   | 40,2    | 40,2 | 32,4 | 27   | 28,9         | 28   | 29,5 |  |
| PDL1 | 46,3 | 32,9    | 33,8 | 50   | 33,3 | 32,4         | 24,6 | 33,1 |  |

Supplementary Figure 9 e

|      |      | CONTROL |      |      |      | αCamKII IL-2 |      |      |  |
|------|------|---------|------|------|------|--------------|------|------|--|
| Areg | 8,37 | 8,41    | 24,8 | 35,6 | 38   | 33,3         | 22,6 | 29,7 |  |
| IL10 | 13,4 | 18      | 17,2 | 2,96 | 11,5 | 28,1         | 24,6 | 6,7  |  |
| IL17 | 3,59 | 5,22    | 14,1 | 4,44 | 8,17 | 3,82         | 3,41 | 7,18 |  |

**Supplementary Figure 11a**

|            | PHP.GFAP-GFP |      |      | PHP.GFAP-IL2 |      |      |      |      |
|------------|--------------|------|------|--------------|------|------|------|------|
| NK         | 13,1         | 4,7  | 21,7 | 18,5         | 26,4 | 22,1 | 13,4 | 7,17 |
| CD8        | 11           | 9,79 | 11   | 13,8         | 8,92 | 10,7 | 8,87 | 10,8 |
| CD4        | 18,5         | 24,1 | 21   | 16,4         | 21,3 | 22,5 | 19,3 | 32,2 |
| Treg cells | 9,82         | 8,88 | 10,3 | 12,5         | 6,53 | 8,06 | 7,41 | 9,91 |

**Supplementary Figure 11b**

|            | PHP.GFAP-GFP |     |     | PHP.GFAP-IL2 |     |     |     |     |
|------------|--------------|-----|-----|--------------|-----|-----|-----|-----|
| NK         | 44           | 53  | 36  | 11           | 7   | 4   | 16  | 26  |
| CD8        | 407          | 195 | 699 | 812          | 438 | 710 | 769 | 225 |
| CD4        | 359          | 262 | 347 | 692          | 573 | 451 | 597 | 236 |
| Treg cells | 33           | 15  | 25  | 116          | 236 | 171 | 143 | 19  |

**Supplementary Figure 11c**

|              | Cluster-01 | Cluster-02 | Cluster-03 | Cluster-04 | Cluster-05 |
|--------------|------------|------------|------------|------------|------------|
| PHP.GFAP-GFP | 47,0       | 18,4       | 16,2       | 15,2       | 3,2        |
|              | 50,4       | 17,2       | 12,8       | 11,2       | 8,4        |
|              | 47,6       | 22,0       | 16,9       | 8,9        | 4,5        |
| PHP.GFAP-IL2 | 58,1       | 12,1       | 14,6       | 8,2        | 7,1        |
|              | 36,4       | 17,2       | 21,5       | 18,5       | 6,4        |
|              | 43,5       | 17,3       | 21,2       | 13,5       | 4,6        |
|              | 40,1       | 22,2       | 21,6       | 10,8       | 5,3        |
|              | 36,6       | 23,9       | 18,8       | 14,1       | 6,6        |

**Supplementary Figure 11d**

|             | PHP.GFAP-GFP |      |      | PHP.GFAP-IL2 |      |      |      |      |
|-------------|--------------|------|------|--------------|------|------|------|------|
| CD25        | 1,61         | 1,59 | 0,95 | 7,59         | 13,4 | 7,84 | 8,71 | 2,73 |
| CD44        | 51           | 40,2 | 46,7 | 34,2         | 55,5 | 52,5 | 56,2 | 55,9 |
| CD62L       | 46,5         | 46,6 | 46,4 | 55,5         | 36,3 | 41,2 | 38,1 | 31,8 |
| CD69        | 42,3         | 27,9 | 35,3 | 54,8         | 53,1 | 50,2 | 40,7 | 39,1 |
| CD103       | 1,29         | 3,19 | 0,63 | 1,08         | 1,03 | 2,75 | 1,65 | 0    |
| CTLA4       | 1,29         | 1,2  | 0,95 | 1,08         | 1,37 | 0,39 | 4,24 | 2,73 |
| ICOS        | 19           | 7,97 | 9,78 | 7,05         | 18,2 | 10,2 | 12,7 | 10   |
| Ki67        | 10           | 10,8 | 10,7 | 7,78         | 13,7 | 11   | 8    | 10   |
| KLRG1       | 2,26         | 1,99 | 3,79 | 0,54         | 1,03 | 0,78 | 2,59 | 1,82 |
| Neuropilin1 | 4,52         | 1,2  | 3,47 | 3,98         | 10,3 | 8,24 | 6,82 | 5    |
| PD1         | 13,5         | 9,96 | 14,2 | 13           | 25,7 | 21,6 | 18,4 | 20,5 |
| ST2         | 1,61         | 0,4  | 0,95 | 0,9          | 3,77 | 0,78 | 1,65 | 0,91 |

**Supplementary Figure 11e**

|                  | Cluster-01 | Cluster-02 | Cluster-03 | Cluster-04 | Cluster-05 | Cluster-06 |
|------------------|------------|------------|------------|------------|------------|------------|
| PHP.GFAP-<br>GFP | 52,8       | 34,0       | 2,8        | 4,2        | 0,2        | 5,9        |
|                  | 44,2       | 46,5       | 0,0        | 9,3        | 0,0        | 0,0        |
|                  | 64,9       | 27,6       | 3,0        | 3,9        | 0,0        | 0,7        |
|                  | 37,7       | 46,7       | 8,3        | 5,5        | 0,7        | 1,1        |
| PHP.GFAP-<br>IL2 | 39,5       | 11,0       | 43,1       | 1,6        | 4,2        | 0,7        |
|                  | 43,1       | 17,6       | 34,7       | 2,2        | 2,2        | 0,3        |
|                  | 46,0       | 36,6       | 11,1       | 4,2        | 0,4        | 1,8        |
|                  | 42,8       | 32,7       | 16,4       | 5,7        | 0,6        | 1,9        |

**Supplementary Figure 11f**

|             | PHP.GFAP-GFP |      |      | PHP.GFAP-IL2 |      |      |      |      |
|-------------|--------------|------|------|--------------|------|------|------|------|
| CD25        | 3,14         | 1,5  | 1,79 | 12,7         | 39,2 | 30,6 | 15,6 | 6,29 |
| CD44        | 69,1         | 55,6 | 73,8 | 55,9         | 63,9 | 63,5 | 70,6 | 64,8 |
| CD62L       | 35,5         | 42,9 | 26,9 | 45           | 10,7 | 17,9 | 36,2 | 32,1 |
| CD69        | 55,8         | 40,6 | 69   | 73,8         | 90,4 | 86,8 | 62,3 | 59,7 |
| CD103       | 9,18         | 0,75 | 0,45 | 4,04         | 10,1 | 10,7 | 5,98 | 4,4  |
| CTLA4       | 0,24         | 0    | 0,74 | 0,49         | 0,17 | 0,14 | 0,91 | 1,26 |
| ICOS        | 8,45         | 0,75 | 2,23 | 1,23         | 1,44 | 1,57 | 3,51 | 3,14 |
| Ki67        | 19,3         | 5,26 | 10,7 | 8,33         | 11,1 | 12,9 | 8,06 | 6,29 |
| KLRG1       | 21,7         | 37,6 | 19,6 | 34,2         | 7,29 | 11,4 | 21,5 | 25,8 |
| Neuropilin1 | 6,28         | 0,75 | 1,34 | 2,82         | 1,44 | 1,86 | 1,04 | 1,26 |
| PD1         | 41,8         | 20,3 | 58   | 35           | 79,2 | 69,1 | 47,3 | 34,6 |
| ST2         | 0,72         | 0    | 1,19 | 4,53         | 21   | 15,6 | 4,16 | 6,29 |

**Supplementary Figure 11g**

|                  | Cluster-01 | Cluster-02 | Cluster-03 | Cluster-04 | Cluster-05 |
|------------------|------------|------------|------------|------------|------------|
| PHP.GFAP-<br>GFP | 75,2       | 4,2        | 15,2       | 5,4        | 0,0        |
|                  | 73,0       | 3,9        | 22,8       | 0,0        | 0,3        |
|                  | 76,2       | 4,1        | 18,6       | 0,5        | 0,5        |
|                  | 70,9       | 16,2       | 10,6       | 1,0        | 1,4        |
| PHP.GFAP-<br>IL2 | 57,6       | 34,0       | 6,3        | 0,5        | 1,6        |
|                  | 64,1       | 27,3       | 6,2        | 0,8        | 1,6        |
|                  | 63,2       | 16,0       | 19,3       | 0,9        | 0,6        |
|                  | 77,4       | 10,5       | 8,9        | 1,6        | 1,6        |



**Supplementary Figure 11h**

|             | PHP.GFAP-GFP |      |      | PHP.GFAP-IL2 |      |      |      |      |  |
|-------------|--------------|------|------|--------------|------|------|------|------|--|
| CD25        | 33,3         | 15   | 23,6 | 26,4         | 43,9 | 44,2 | 28,4 | 15,5 |  |
| CD44        | 96,2         | 85   | 90   | 94,9         | 94,4 | 95,4 | 94,9 | 72   |  |
| CD62L       | 8,55         | 11,6 | 6,02 | 5,11         | 2,2  | 2,95 | 6,86 | 6,15 |  |
| CD69        | 68,5         | 49,6 | 61,3 | 84,7         | 85,1 | 89,7 | 67   | 57,1 |  |
| CD103       | 1,54         | 10,7 | 2,93 | 3,87         | 8,6  | 8,29 | 4,51 | 16,6 |  |
| CTLA4       | 0            | 0,29 | 0    | 0,14         | 0,42 | 0    | 0,45 | 1,68 |  |
| ICOS        | 26,8         | 14,4 | 18,1 | 23,2         | 47,1 | 45,1 | 23   | 16,2 |  |
| Ki67        | 12,1         | 4,41 | 9,1  | 10,6         | 10,6 | 12,2 | 10,1 | 5,17 |  |
| KLRG1       | 10,1         | 4,41 | 5,86 | 8,84         | 15,3 | 12,6 | 11,1 | 7,97 |  |
| Neuropilin1 | 33           | 10,6 | 21,3 | 34           | 24,5 | 22,5 | 30,3 | 7,13 |  |
| PD1         | 52,6         | 16,3 | 31,9 | 55,7         | 59   | 56,5 | 50,1 | 19,9 |  |
| ST2         | 17,9         | 11   | 13,3 | 7,6          | 12,9 | 12,4 | 15,7 | 14   |  |

**Supplementary Figure 11i**

|              | Cluster-01 | Cluster-02 | Cluster-03 | Cluster-04 | Cluster-05 |
|--------------|------------|------------|------------|------------|------------|
| PHP.GFAP-GFP | 71,1       | 0,0        | 2,6        | 10,5       | 15,8       |
|              | 77,8       | 5,6        | 0,0        | 5,6        | 11,1       |
|              | 66,7       | 7,4        | 11,1       | 11,1       | 3,7        |
| PHP.GFAP-IL2 | 50,7       | 12,7       | 18,3       | 11,3       | 7,0        |
|              | 52,1       | 20,2       | 19,3       | 6,7        | 1,7        |
|              | 44,4       | 31,3       | 16,2       | 4,0        | 4,0        |
|              | 61,8       | 21,3       | 11,2       | 1,1        | 4,5        |
|              | 62,9       | 11,4       | 2,9        | 17,1       | 5,7        |

**Supplementary Figure 11j**

|             | PHP.GFAP-GFP |    |      | PHP.GFAP-IL2 |      |      |      |      |  |
|-------------|--------------|----|------|--------------|------|------|------|------|--|
| CD25        | 64,5         | 55 | 55,6 | 67,4         | 85,1 | 90,3 | 61,8 | 69,2 |  |
| CD44        | 61,3         | 55 | 77,8 | 76,7         | 85,1 | 84,7 | 79,4 | 84,6 |  |
| CD62L       | 29           | 15 | 16,7 | 25,6         | 9,46 | 15,3 | 8,82 | 23,1 |  |
| CD69        | 38,7         | 40 | 66,7 | 72,1         | 83,8 | 77,8 | 60,3 | 53,8 |  |
| CD103       | 12,9         | 35 | 16,7 | 14           | 23   | 33,3 | 20,6 | 7,69 |  |
| CTLA4       | 51,6         | 70 | 61,1 | 67,4         | 67,6 | 66,7 | 66,2 | 61,5 |  |
| ICOS        | 48,4         | 40 | 33,3 | 48,8         | 58,1 | 54,2 | 48,5 | 61,5 |  |
| KI67        | 25,8         | 20 | 33,3 | 34,9         | 21,6 | 33,3 | 25   | 23,1 |  |
| KLRG1       | 16,1         | 15 | 22,2 | 14           | 13,5 | 22,2 | 11,8 | 23,1 |  |
| Neuropilin1 | 90,3         | 65 | 66,7 | 83,7         | 71,6 | 73,6 | 79,4 | 69,2 |  |
| PD1         | 64,5         | 60 | 66,7 | 81,4         | 90,5 | 86,1 | 83,8 | 76,9 |  |
| ST2         | 22,6         | 20 | 16,7 | 11,6         | 12,2 | 23,6 | 17,6 | 7,69 |  |

|                                 |            |                   |       |       |              |       |       |       |               |       |       |      |
|---------------------------------|------------|-------------------|-------|-------|--------------|-------|-------|-------|---------------|-------|-------|------|
| <b>Supplementary Figure 12a</b> | microglia  | PHP.GFAP-GFP Sham |       |       | PHP.GFAP-GFP |       |       |       | PHP.GFAP-IL-2 |       |       |      |
|                                 |            | 16638             | 32733 | 18678 | 46925        | 49249 | 60178 | 35636 | 24115         | 34991 | 13132 | 4916 |
| <b>Supplementary Figure 12b</b> | CD8        | PHP.GFAP-GFP Sham |       |       | PHP.GFAP-GFP |       |       |       | PHP.GFAP-IL-2 |       |       |      |
|                                 |            | 20,3              | 18,6  | 9,49  | 16,7         | 18    | 16,5  | 12,8  | 13,7          | 14,4  | 25    | 17,1 |
|                                 | CD4        | 4,88              | 5,82  | 11    | 15,2         | 9,05  | 13,8  | 9,03  | 8,55          | 7,69  | 10,4  | 13,7 |
| <b>Supplementary Figure 12c</b> | Treg cells | PHP.GFAP-GFP Sham |       |       | PHP.GFAP-GFP |       |       |       | PHP.GFAP-IL-2 |       |       |      |
|                                 |            | 16                | 44    | 112   | 147          | 97    | 337   | 57    | 101           | 61    | 102   | 321  |
|                                 | CD4        | 133               | 316   | 1314  | 707          | 536   | 1010  | 471   | 292           | 278   | 249   | 1067 |
|                                 | CD8        | 624               | 1165  | 1252  | 961          | 1275  | 1621  | 757   | 632           | 642   | 855   | 1746 |
| <b>Supplementary Figure 12d</b> | CD25       | PHP.GFAP-GFP Sham |       |       | PHP.GFAP-GFP |       |       |       | PHP.GFAP-IL-2 |       |       |      |
|                                 |            | 0                 | 2,22  | 0,84  | 1,98         | 0,93  | 3,66  | 2,12  | 2,05          | 3,6   | 2,01  | 2,16 |
|                                 | CD44       | 94                | 88,6  | 76,3  | 96,2         | 90,7  | 97,9  | 81,3  | 72,3          | 96,8  | 97,6  | 98,7 |
|                                 | CD69       | 10,5              | 9,18  | 4,11  | 17           | 14,2  | 17,3  | 7,86  | 12,3          | 19,1  | 14,5  | 22,9 |
|                                 | KI67       | 9,77              | 10,1  | 7     | 12,7         | 13,4  | 17,8  | 14,9  | 9,25          | 9,71  | 19,3  | 24,4 |
|                                 | PDL1       | 71,4              | 63    | 40,7  | 80,6         | 75    | 68,3  | 65,4  | 64,4          | 74,5  | 69,1  | 59,2 |
|                                 | ST2        | 0                 | 0     | 0,076 | 0,14         | 0     | 0,2   | 0,42  | 0             | 1,08  | 0,4   | 0,37 |
| <b>Supplementary Figure 12e</b> | Areg       | PHP.GFAP-GFP Sham |       |       | PHP.GFAP-GFP |       |       |       | PHP.GFAP-IL-2 |       |       |      |
|                                 |            | 0,99              | 1,27  | 0,53  | 0,24         | 1,15  | 0,34  | 0,54  | 1,01          | 1,31  | 1,46  | 1,53 |
|                                 | IL10       | 2,03              | 4,11  | 7,06  | 9,36         | 6,38  | 10,4  | 9,76  | 5,39          | 2,79  | 2,03  | 4,37 |
| <b>Supplementary Figure 12f</b> | Areg       | PHP.GFAP-GFP Sham |       |       | PHP.GFAP-GFP |       |       |       | PHP.GFAP-IL-2 |       |       |      |
|                                 |            | 1329              | 1700  | 1718  | 1724         | 1757  | 1803  | 1831  | 1622          | 1517  | 1454  | 1706 |
| <b>Supplementary Figure 12g</b> | CD25       | PHP.GFAP-GFP Sham |       |       | PHP.GFAP-GFP |       |       |       | PHP.GFAP-IL-2 |       |       |      |
|                                 |            | 87,5              | 77,3  | s     | 75,5         | 61,9  | 71,2  | 73,7  | 74,3          | 75,4  | 63,7  | 72,6 |
|                                 | CD44       | 100               | 97,7  | 90,2  | 98           | 99    | 98,5  | 93    | 96            | 98,4  | 99    | 99,4 |
|                                 | CD69       | 18,8              | 20,5  | 11,6  | 43,5         | 22,7  | 32    | 28,1  | 36,6          | 31,1  | 20,6  | 33,6 |
|                                 | KI67       | 25                | 36,4  | 28,6  | 25,2         | 35,1  | 37,7  | 21,1  | 21,8          | 31,1  | 61,8  | 49,5 |
|                                 | PDL1       | 68,8              | 77,3  | 67    | 84,4         | 91,8  | 78,3  | 80,7  | 81,2          | 77    | 86,3  | 75,4 |
|                                 | ST2        | 0                 | 0     | 0,89  | 0,68         | 1,03  | 0,89  | 0     | 0             | 1,64  | 1,96  | 1,25 |

|                                 |                    |                   |         |         |         |              |               |         |         |               |         |      |  |
|---------------------------------|--------------------|-------------------|---------|---------|---------|--------------|---------------|---------|---------|---------------|---------|------|--|
| <b>Supplementary Figure 12h</b> |                    | PHP.GFAP-GFP Sham |         |         |         | PHP.GFAP-GFP |               |         |         | PHP.GFAP-IL-2 |         |      |  |
|                                 | Areg               | 26,3              | 22,2    | 21,4    | 4,11    | 7,69         | 16,5          | 7,58    | 20,9    | 21,9          | 34,7    | 22,8 |  |
|                                 | IL10               | 0                 | 0       | 0       | 2,74    | 1,1          | 0,79          | 1,52    | 0       | 0             | 1,33    | 1,63 |  |
| <b>Supplementary Figure 12i</b> |                    | PHP.GFAP-GFP Sham |         |         |         | PHP.GFAP-GFP |               |         |         | PHP.GFAP-IL-2 |         |      |  |
|                                 | Areg               | 2220              | 2095    | 1934    | 1548    | 1594         | 1928          | 1631    | 1997    | 2237          | 2360    | 2007 |  |
| <b>Supplementary Figure 12l</b> |                    | PHP.GFAP-GFP      |         |         |         |              | PHP.GFAP-IL-2 |         |         |               |         |      |  |
|                                 | CD4                | 35,5              | 49,1    | 34,5    | 20      | 33,7         | 41,3          | 41,3    | 54,4    | 45            | 41,8    |      |  |
|                                 | CD8                | 33,2              | 30,7    | 35,8    | 18,5    | 32           | 34            | 41      | 37,7    | 42,2          | 35,9    |      |  |
|                                 | TCR $\gamma\delta$ | 1,35              | 2       | 1,64    | 0,96    | 0,34         | 0,98          | 0,49    | 0,68    | 0,83          | 2,58    |      |  |
| <b>Supplementary Figure 12m</b> |                    | PHP.GFAP-GFP      |         |         |         |              | PHP.GFAP-IL-2 |         |         |               |         |      |  |
|                                 | Treg cells         | 12                | 5,33    | 8,94    | 20,7    | 21,7         | 12,1          | 18      | 6       | 15,6          | 14,4    |      |  |
| <b>Supplementary Figure 12n</b> |                    | PHP.GFAP-GFP      |         |         |         |              | PHP.GFAP-IL-2 |         |         |               |         |      |  |
|                                 | CD4 conv           | 786722            | 82768   | 134952  | 26294   | 1443129      | 26285         | 140266  | 1174484 | 87318         | 26940   |      |  |
|                                 | CD8                | 735202            | 51771   | 140053  | 24220   | 1371643      | 21673         | 139179  | 814580  | 81998         | 23155   |      |  |
|                                 | TCR $\gamma\delta$ | 44212             | 6095    | 11089   | 2579    | 32553        | 956           | 3040    | 22184   | 2899          | 3211    |      |  |
|                                 | B cells            | 690306            | 92823   | 116737  | 36274   | 3340264      | 21626         | 158299  | 594021  | 92936         | 38126   |      |  |
| <b>Supplementary Figure 12o</b> |                    | PHP.GFAP-GFP      |         |         |         |              | PHP.GFAP-IL-2 |         |         |               |         |      |  |
|                                 | CD4                | 48,1              | 49,2    | 46,2    | 43,5    | 45,3         | 46,8          | 45,1    | 41,8    | 43,6          | 45,4    |      |  |
|                                 | CD8                | 40,6              | 43,7    | 43,3    | 48,6    | 47,1         | 41,4          | 47,5    | 47,4    | 44,4          | 42,9    |      |  |
|                                 | TCR $\gamma\delta$ | 0,27              | 0,51    | 0,34    | 0,34    | 0,36         | 0,24          | 0,42    | 0,42    | 0,29          | 1,11    |      |  |
| <b>Supplementary Figure 12p</b> |                    | PHP.GFAP-GFP      |         |         |         |              | PHP.GFAP-IL-2 |         |         |               |         |      |  |
|                                 | Treg cells         | 12,1              | 14,4    | 13,6    | 12,6    | 12,6         | 14,6          | 12,9    | 14,2    | 13,9          | 14,7    |      |  |
| <b>Supplementary Figure 12q</b> |                    | PHP.GFAP-GFP      |         |         |         |              | PHP.GFAP-IL-2 |         |         |               |         |      |  |
|                                 | CD4 conv           | 2362432           | 1688499 | 1578027 | 1905000 | 1254611      | 2470943       | 1745558 | 1156024 | 1491065       | 820810  |      |  |
|                                 | Treg cells         | 35760             | 34656   | 26807   | 34371   | 19838        | 72272         | 37664   | 32803   | 29520         | 15113   |      |  |
|                                 | CD8                | 1995264           | 1500750 | 1478933 | 2130480 | 1301820      | 2187077       | 1840378 | 1312679 | 1517705       | 776466  |      |  |
|                                 | TCR $\gamma\delta$ | 30912             | 45411   | 32267   | 35880   | 27387        | 32089         | 40551   | 29093   | 28135         | 38663   |      |  |
|                                 | B cells            | 3370688           | 2812809 | 3053600 | 2802840 | 2482554      | 3427560       | 2678891 | 2111279 | 2397822       | 1047353 |      |  |

|                                 |       |                   |              |       |       |               |       |       |       |       |
|---------------------------------|-------|-------------------|--------------|-------|-------|---------------|-------|-------|-------|-------|
| <b>Supplementary Figure 13a</b> |       | PHP.GFAP-GFP Sham | PHP.GFAP-GFP |       |       | PHP.GFAP-IL-2 |       |       |       |       |
| microglia                       | 64826 | 62716             | 71752        | 71172 | 99994 | 91528         | 45580 | 57840 | 42158 | 57304 |
| <b>Supplementary Figure 13b</b> |       | PHP.GFAP-GFP Sham | PHP.GFAP-GFP |       |       | PHP.GFAP-IL-2 |       |       |       |       |
| CD8                             | 3,26  | 5,33              | 10,7         | 8,49  | 9,19  | 10,6          | 18,7  | 15,5  | 9,37  | 6,11  |
| CD4                             | 3,35  | 5,16              | 13,8         | 9,32  | 11    | 14,3          | 14,1  | 12,3  | 15,9  | 8,36  |
| TCR $\gamma\delta$              | 1,3   | 1,23              | 1,25         | 1,29  | 1,27  | 2,12          | 0,48  | 2,32  | 1,56  | 1,17  |
| <b>Supplementary Figure 13c</b> |       | PHP.GFAP-GFP Sham | PHP.GFAP-GFP |       |       | PHP.GFAP-IL-2 |       |       |       |       |
| Tregs                           | 10,5  | 9,43              | 19,7         | 27,2  | 14,8  | 21,3          | 7,07  | 19,4  | 28,6  | 15,8  |
| <b>Supplementary Figure 13d</b> |       | PHP.GFAP-GFP Sham | PHP.GFAP-GFP |       |       | PHP.GFAP-IL-2 |       |       |       |       |
| CD4                             | 568   | 1020              | 2344         | 1268  | 1998  | 2486          | 31016 | 4016  | 1624  | 1196  |
| Treg cells                      | 70    | 110               | 598          | 502   | 360   | 712           | 2246  | 1014  | 696   | 236   |
| CD8                             | 686   | 1130              | 3894         | 2026  | 3034  | 4518          | 25402 | 4134  | 4134  | 2038  |
| TCR $\gamma\delta$              | 184   | 182               | 352          | 194   | 352   | 544           | 864   | 648   | 406   | 286   |
| <b>Supplementary Figure 13e</b> |       | PHP.GFAP-GFP Sham | PHP.GFAP-GFP |       |       | PHP.GFAP-IL-2 |       |       |       |       |
| CD25                            | 2,16  | 1,57              | 2,3          | 3,48  | 1,2   | 1,37          | 1,28  | 2,04  | 2,34  | 1,24  |
| CD44                            | 45,4  | 46,5              | 74,9         | 74,9  | 43,3  | 82,9          | 13,4  | 55,4  | 69,4  | 58,9  |
| CD69                            | 7,04  | 5,88              | 15,2         | 11,1  | 5,61  | 7,96          | 2,28  | 3,93  | 4,56  | 5,52  |
| Ki67                            | 14,4  | 18                | 31,5         | 30,5  | 14,4  | 18,8          | 4,67  | 18    | 21,3  | 17,1  |
| PDL1                            | 13,4  | 16,1              | 19           | 24,5  | 11,2  | 18,4          | 6,51  | 12,5  | 21,3  | 19,9  |
| <b>Supplementary Figure 13f</b> |       | PHP.GFAP-GFP Sham | PHP.GFAP-GFP |       |       | PHP.GFAP-IL-2 |       |       |       |       |
| Areg                            | 1,69  | 6,52              | 11,8         | 14    | 6,67  | 17,3          | 0,4   | 21,9  | 32,4  | 0     |
| IL10                            | 5,08  | 6,52              | 5,88         | 14    | 11,7  | 17,3          | 1,44  | 30,5  | 31    | 6,06  |
| IL17                            | 3,39  | 10,9              | 9,8          | 10,5  | 6,67  | 7,69          | 0,94  | 11,7  | 8,45  | 6,06  |
| <b>Supplementary Figure 13g</b> |       | PHP.GFAP-GFP Sham | PHP.GFAP-GFP |       |       | PHP.GFAP-IL-2 |       |       |       |       |
| CD25                            | 45,7  | 29,1              | 49,5         | 51,4  | 38,9  | 30,1          | 33,6  | 39,4  | 37,9  | 38,1  |
| CD44                            | 68,6  | 67,3              | 75,6         | 80,1  | 69,4  | 78,4          | 47,2  | 75    | 77,6  | 68,6  |
| CD69                            | 11,4  | 21,8              | 26,4         | 13,9  | 15,6  | 11,5          | 11,4  | 9,47  | 7,18  | 21,2  |
| Ki67                            | 22,9  | 38,2              | 39,8         | 47,8  | 38,9  | 33,4          | 31,8  | 43,8  | 40,2  | 37,3  |
| PDL1                            | 28,6  | 16,4              | 22,7         | 29,9  | 13,9  | 17,7          | 15,3  | 16    | 25    | 33,1  |
| ST2                             | 8,57  | 5,45              | 6,35         | 6,37  | 5,56  | 7,87          | 4,97  | 11,8  | 7,76  | 3,39  |

**Supplementary Figure 13h**

|      | PHP.GFAP-GFP Sham |      | PHP.GFAP-GFP |    |      | PHP.GFAP-IL-2 |      |      |    |    |
|------|-------------------|------|--------------|----|------|---------------|------|------|----|----|
| Areg | 22,2              | 0    | 22,2         | 30 | 27,3 | 50            | 10,2 | 31,8 | 50 | 60 |
| IL10 | 5,56              | 22,2 | 0            | 60 | 18,2 | 33,3          | 18,4 | 50   | 50 | 50 |
| IL17 | 0                 | 11,1 | 0            | 10 | 0    | 0             | 2,04 | 4,55 | 0  | 20 |

**Supplementary Figure 13i**

|                    | PHP.GFAP-GFP Sham |      | PHP.GFAP-GFP |      |      | PHP.GFAP-IL-2 |      |      |      |      |
|--------------------|-------------------|------|--------------|------|------|---------------|------|------|------|------|
| CD4conv            | 23                | 18,8 | 25,2         | 20,6 | 19,9 | 17,3          | 16,7 | 21,2 | 18,3 | 22,5 |
| Treg cells         | 2,39              | 1,81 | 3,76         | 3,46 | 3,29 | 2,88          | 1,64 | 3,55 | 2,03 | 2,25 |
| CD8                | 21,6              | 19,8 | 24,1         | 20,4 | 18,6 | 14,7          | 13,3 | 20,4 | 14,7 | 19   |
| B cells            | 41,8              | 48   | 38           | 37,2 | 50,2 | 47,3          | 36,7 | 43,1 | 50,1 | 41,7 |
| TCR $\gamma\delta$ | 0,49              | 0,44 | 0,47         | 0,4  | 0,5  | 0,28          | 0,24 | 0,58 | 0,29 | 0,41 |

**Supplementary Figure 13j**

|                    | PHP.GFAP-GFP Sham |         | PHP.GFAP-GFP |        |         | PHP.GFAP-IL-2 |         |         |         |         |
|--------------------|-------------------|---------|--------------|--------|---------|---------------|---------|---------|---------|---------|
| CD4conv            | 1364833           | 984986  | 1776059      | 272585 | 1080076 | 883947        | 477000  | 1385400 | 762554  | 972993  |
| Treg cells         | 141797            | 94661   | 264941       | 45722  | 178297  | 147001        | 46682   | 231967  | 84562   | 97475   |
| CD8                | 1278433           | 1035996 | 1699725      | 270026 | 1009276 | 753153        | 379280  | 1332233 | 612819  | 824764  |
| B cells            | 2479495           | 2508686 | 2680804      | 491773 | 2723952 | 2418644       | 1047075 | 2820700 | 2087727 | 1805548 |
| TCR $\gamma\delta$ | 29193             | 22821   | 32922        | 5287   | 27166   | 14553         | 6748    | 37733   | 12129   | 17793   |

|                                 |                                |       |       |       |       |              |       |       |       |               |       |       |       |       |       |       |
|---------------------------------|--------------------------------|-------|-------|-------|-------|--------------|-------|-------|-------|---------------|-------|-------|-------|-------|-------|-------|
| <b>Supplementary Figure 14a</b> | PHP.GFAP-GFP Sham<br>microglia | 66730 | 56802 | 35386 | 72700 | 90926        | 1E+05 | 47608 | 93190 | 30324         | 1E+05 | 1E+05 | 60612 | 59764 | 1E+05 | 83284 |
| <b>Supplementary Figure 14b</b> | PHP.GFAP-GFP Sham              |       |       |       |       | PHP.GFAP-GFP |       |       |       | PHP.GFAP-IL-2 |       |       |       |       |       |       |
|                                 | CD8                            | 6,25  | 8,21  | 10,38 | 14,6  | 11,1         | 20,2  | 12,8  | 12,6  | 15,6          | 20,3  | 12,9  | 16,7  | 15,5  | 13,2  | 20,2  |
|                                 | CD4                            | 4,04  | 6,02  | 7,08  | 11,6  | 11,8         | 12,4  | 9,28  | 12,5  | 11,8          | 12,5  | 16,3  | 10,8  | 13,3  | 13,4  | 15,9  |
|                                 | TCR $\gamma\delta$             | 1,28  | 2,23  | 2,3   | 4     | 8,22         | 3,35  | 4,15  | 6,06  | 4,53          | 4,13  | 4,08  | 3,5   | 7,25  | 9,19  | 5,02  |
| <b>Supplementary Figure 14c</b> | PHP.GFAP-GFP Sham              |       |       |       |       | PHP.GFAP-GFP |       |       |       | PHP.GFAP-IL-2 |       |       |       |       |       |       |
|                                 | Treg cells                     | 8,09  | 6,25  | 6,13  | 27,5  | 24,4         | 25,9  | 25,3  | 38,9  | 31,7          | 28    | 25,8  | 24,1  | 25,5  | 33,8  | 29,2  |
| <b>Supplementary Figure 14d</b> | PHP.GFAP-GFP Sham              |       |       |       |       | PHP.GFAP-GFP |       |       |       | PHP.GFAP-IL-2 |       |       |       |       |       |       |
|                                 | CD4                            | 672   | 408   | 430   | 2472  | 2432         | 3992  | 1448  | 1886  | 890           | 3918  | 2872  | 1400  | 2484  | 2650  | 2550  |
|                                 | Treg cells                     | 58    | 28    | 32    | 984   | 834          | 1458  | 516   | 1272  | 438           | 1584  | 1052  | 466   | 870   | 1460  | 1100  |
|                                 | CD8                            | 1166  | 582   | 736   | 4510  | 3194         | 9174  | 2936  | 3294  | 1826          | 9136  | 3220  | 2974  | 3966  | 4266  | 4786  |
|                                 | TCR $\gamma\delta$             | 238   | 136   | 140   | 1112  | 2374         | 1522  | 952   | 1588  | 530           | 1860  | 920   | 624   | 1860  | 2836  | 1094  |
| <b>Supplementary Figure 14e</b> | PHP.GFAP-GFP Sham              |       |       |       |       | PHP.GFAP-GFP |       |       |       | PHP.GFAP-IL-2 |       |       |       |       |       |       |
|                                 | CD25                           | 0     | 0,49  | 0     | 1,29  | 1,39         | 1,5   | 1,23  | 2,55  | 1,07          | 1,28  | 2,09  | 1,29  | 1,05  | 2,29  | 1,1   |
|                                 | CD44                           | 53,6  | 59,8  | 54    | 82,9  | 85,1         | 85,6  | 83,1  | 84    | 77,3          | 86,2  | 81,4  | 81,4  | 90,3  | 82,6  | 82,2  |
|                                 | CD69                           | 33,9  | 24,5  | 30,7  | 32,9  | 37,2         | 36,1  | 27,6  | 27,3  | 33,3          | 30,6  | 38    | 33,7  | 32,5  | 21,8  | 30,7  |
|                                 | Ki67                           | 14,9  | 9,31  | 7,44  | 15,6  | 16,9         | 12,6  | 17,8  | 20,3  | 13,5          | 22,7  | 24,7  | 15,6  | 34,1  | 18,9  | 19    |
| <b>Supplementary Figure 14f</b> | PHP.GFAP-GFP Sham              |       |       |       |       | PHP.GFAP-GFP |       |       |       | PHP.GFAP-IL-2 |       |       |       |       |       |       |
|                                 | Areg                           | 29,1  | 24,1  | 32,2  | 67,5  | 63           | 61,7  | 68,6  | 63,6  | 59,6          | 57,8  | 63,3  | 57,6  | 65,2  | 60,4  | 35,7  |
|                                 | IL10                           | 22,3  | 20,2  | 23    | 21,3  | 21,2         | 29,5  | 31,5  | 35,9  | 33,7          | 36,3  | 31,4  | 30,8  | 36,3  | 36,5  | 32    |
|                                 | IL17                           | 18,2  | 15    | 13,1  | 6,56  | 8,92         | 6,66  | 7,67  | 11,2  | 9,06          | 10,7  | 8,19  | 8,48  | 11,1  | 11,5  | 22,6  |
| <b>Supplementary Figure 14g</b> | PHP.GFAP-GFP Sham              |       |       |       |       | PHP.GFAP-GFP |       |       |       | PHP.GFAP-IL-2 |       |       |       |       |       |       |
|                                 | CD25                           | 20,7  | 35,7  | 43,8  | 42,3  | 42,7         | 49    | 51,9  | 63,7  | 42            | 59,5  | 58,7  | 62,7  | 39,8  | 42,9  | 44,5  |
|                                 | CD44                           | 75,9  | 42,9  | 75    | 83,5  | 80,8         | 81,3  | 89,1  | 89,6  | 81,7          | 86,4  | 83,3  | 73,8  | 90,6  | 85,6  | 76,2  |
|                                 | CD69                           | 31    | 35,7  | 18,8  | 44,3  | 35,3         | 43,5  | 30,6  | 32,2  | 42,9          | 36,1  | 41,1  | 47,6  | 29,2  | 27,7  | 30    |
|                                 | Ki67                           | 58,6  | 28,6  | 43,8  | 47,2  | 50,8         | 53,6  | 57,4  | 66,2  | 51,6          | 64,8  | 58,4  | 47,2  | 77,2  | 61,4  | 61,1  |
| <b>Supplementary Figure 14h</b> | PHP.GFAP-GFP Sham              |       |       |       |       | PHP.GFAP-GFP |       |       |       | PHP.GFAP-IL-2 |       |       |       |       |       |       |
|                                 | Areg                           | 39,4  | 26,7  | 28,6  | 34,1  | 14,5         | 11,9  | 30    | 7,95  | 9,96          | 10,9  | 16,9  | 16,1  | 23,1  | 17,1  | 20,5  |
|                                 | IL10                           | 9,09  | 13,3  | 14,3  | 17,3  | 4,71         | 7,29  | 7,59  | 9,17  | 3,98          | 8,03  | 10,5  | 14    | 19,2  | 10,5  | 16,9  |
|                                 | IL17                           | 15,2  | 10    | 17,9  | 6,73  | 7,74         | 7,17  | 7,59  | 6,85  | 3,59          | 5,81  | 5,83  | 6,61  | 17,4  | 10,1  | 17,1  |

|                                 |              |       |       |       |       |      |       |      |       |      |               |       |      |       |       |       |       |      |      |      |
|---------------------------------|--------------|-------|-------|-------|-------|------|-------|------|-------|------|---------------|-------|------|-------|-------|-------|-------|------|------|------|
| <b>Supplementary Figure 15a</b> | PHP.GFAP-GFP |       |       |       |       |      |       |      |       |      | PHP.GFAP-IL-2 |       |      |       |       |       |       |      |      |      |
| D0                              | 35,1         | 34,7  | 27,8  | 33,6  | 34,6  |      |       |      |       |      |               |       |      |       |       |       |       |      |      |      |
| D15                             | 17,1         | 39,7  | 14,2  | 15,9  | 18,5  |      |       |      |       |      | 39,6          | 24,1  | 39,1 | 28,1  | 17,6  |       |       |      |      |      |
| D21                             | 25,4         | 26,4  | 29    | 19    | 33,1  | 23,7 | 33,3  | 41,9 | 29    | 25,6 | 32,7          | 30,7  | 24,4 | 29    | 10,7  | 25,1  | 19,3  | 32,8 | 29,4 | 24   |
| D30                             | 31,7         | 45,2  | 31,7  | 38,6  | 34,6  | 28,4 | 22,1  |      |       |      | 30,4          | 25,8  | 27,1 | 47,6  | 40,6  | 38,3  |       |      |      |      |
| <b>Supplementary Figure 15b</b> | PHP.GFAP-GFP |       |       |       |       |      |       |      |       |      | PHP.GFAP-IL-2 |       |      |       |       |       |       |      |      |      |
| D0                              | 29,6         | 28    | 34,7  | 16,9  | 25,3  |      |       |      |       |      |               |       |      |       |       |       |       |      |      |      |
| D15                             | 62,7         | 67    | 79,7  | 77,2  | 68,2  |      |       |      |       |      | 80,7          | 65    | 79,8 | 77,9  | 78,2  |       |       |      |      |      |
| D21                             | 73,8         | 72,1  | 63,9  | 67,3  | 64,9  | 80,1 | 76,5  | 83,1 | 65    | 62,1 | 82,1          | 66,2  | 70,7 | 58,1  | 77,2  | 68,6  | 59,1  | 78,5 | 69,2 | 68   |
| D30                             | 66,8         | 69,8  | 72,8  | 63,7  | 82,6  | 67,7 | 72    |      |       |      | 28            | 77,7  | 81,2 | 82,6  | 83,6  | 74,5  |       |      |      |      |
| <b>Supplementary Figure 15c</b> | PHP.GFAP-GFP |       |       |       |       |      |       |      |       |      | PHP.GFAP-IL-2 |       |      |       |       |       |       |      |      |      |
| D0                              | 10,6         | 12,6  | 10,5  | 7,43  | 10,1  |      |       |      |       |      |               |       |      |       |       |       |       |      |      |      |
| D15                             | 30,8         | 27,9  | 14,1  | 15,9  | 15,1  |      |       |      |       |      | 12,3          | 28,2  | 14,7 | 14,1  | 15,6  |       |       |      |      |      |
| D21                             | 20,7         | 23,3  | 30,1  | 24,9  | 28,3  | 17,4 | 16,7  | 13,6 | 29,6  | 33,3 | 13,1          | 28,6  | 23,3 | 33,6  | 16,6  | 28,6  | 37,9  | 18,5 | 25,3 | 24   |
| D30                             | 28,2         | 24,8  | 23,3  | 29    | 12,7  | 27   | 23,7  |      |       |      | 55,5          | 21,3  | 17,6 | 16,2  | 15,1  | 23,7  |       |      |      |      |
| <b>Supplementary Figure 15d</b> | PHP.GFAP-GFP |       |       |       |       |      |       |      |       |      | PHP.GFAP-IL-2 |       |      |       |       |       |       |      |      |      |
| D0                              | 131          | 102   | 195   | 236   | 121   |      |       |      |       |      |               |       |      |       |       |       |       |      |      |      |
| D15                             | 11238        | 28336 | 8580  | 8622  | 6274  |      |       |      |       |      | 21080         | 17924 | 1218 | 31062 | 10108 |       |       |      |      |      |
| D21                             | 8828         | 190   | 346   | 1916  | 3258  | 1790 | 884   | 4272 | 4786  | 2348 | 19416         | 9358  | 3202 | 356   | 20    | 410   | 6304  | 1038 | 6910 | 1032 |
| D30                             | 16514        | 14088 | 13792 | 4590  | 3190  | 4280 | 9114  |      |       |      | 684           | 4900  | 5742 | 1618  | 930   | 4320  |       |      |      |      |
| <b>Supplementary Figure 15e</b> | PHP.GFAP-GFP |       |       |       |       |      |       |      |       |      | PHP.GFAP-IL-2 |       |      |       |       |       |       |      |      |      |
| D0                              | 161          | 97    | 340   | 247   | 124   |      |       |      |       |      |               |       |      |       |       |       |       |      |      |      |
| D15                             | 32540        | 26516 | 38084 | 33404 | 19964 |      |       |      |       |      | 24416         | 35434 | 1236 | 59868 | 31382 |       |       |      |      |      |
| D21                             | 19386        | 202   | 294   | 1778  | 5444  | 572  | 486   | 3470 | 11382 | 2742 | 28816         | 16636 | 3018 | 476   | 34    | 1280  | 4586  | 366  | 2476 | 862  |
| D30                             | 17998        | 7296  | 17790 | 3690  | 2760  | 5978 | 19318 |      |       |      | 254           | 8870  | 9912 | 816   | 986   | 4244  |       |      |      |      |
| <b>Supplementary Figure 15f</b> | PHP.GFAP-GFP |       |       |       |       |      |       |      |       |      | PHP.GFAP-IL-2 |       |      |       |       |       |       |      |      |      |
| D0                              | 19           | 14    | 40    | 20    | 14    |      |       |      |       |      |               |       |      |       |       |       |       |      |      |      |
| D15                             | 14962        | 10580 | 6378  | 6544  | 3742  |      |       |      |       |      | 3518          | 14336 | 220  | 10058 | 5996  |       |       |      |      |      |
| D21                             | 3370         | 1372  | 5344  | 11696 | 2374  | 4214 | 44    | 48   | 810   | 2920 | 476           | 7040  | 1580 | 7872  | 5782  | 12010 | 10666 | 710  | 174  | 12   |
| D30                             | 7588         | 2592  | 5686  | 1678  | 426   | 2384 | 6362  |      |       |      | 504           | 2428  | 2154 | 160   | 178   | 1350  |       |      |      |      |

**Supplementary Figure 15g**

|             | PHP.GFAP-GFP |      |      |      |      |        | PHP.GFAP-IL-2 |      |      |      |      |  |
|-------------|--------------|------|------|------|------|--------|---------------|------|------|------|------|--|
| CD25        | 39,8         | 42,1 | 38,2 | 23,4 | 34,4 | 35,58  | 29,2          | 36,5 | 30,7 | 32,2 | 31,4 |  |
| CD44        | 38,2         | 33,7 | 28,3 | 24,3 | 32,4 | 31,38  | 31,2          | 33,4 | 33,9 | 40,3 | 41,2 |  |
| CD62L       | 22,1         | 23,9 | 32,4 | 31,3 | 18,5 | 25,64  | 16,8          | 15,2 | 17,9 | 18,8 | 17,3 |  |
| CD69        | 37,2         | 39,6 | 27,8 | 29,3 | 42,9 | 35,36  | 38,9          | 48,1 | 38,8 | 39,4 | 41,6 |  |
| CD103       | 9,76         | 8,49 | 5,93 | 5,7  | 8,08 | 7,592  | 7,53          | 11,1 | 8,91 | 7,81 | 9,02 |  |
| CTLA4       | 53,7         | 61,8 | 55,1 | 51,4 | 69,1 | 58,22  | 56,9          | 73,1 | 60,9 | 52,8 | 53,7 |  |
| GITR        | 58,1         | 58,9 | 55,7 | 49,4 | 70,3 | 58,48  | 63,4          | 79,5 | 74,4 | 57,4 | 63,9 |  |
| Helios      | 84,8         | 86,7 | 57,4 | 89,7 | 88,9 | 81,5   | 89,1          | 89,4 | 84,3 | 86,6 | 88,1 |  |
| ICOS        | 70,6         | 68,7 | 44,2 | 45,4 | 67,9 | 59,36  | 66,3          | 83,2 | 67,4 | 66,7 | 64,9 |  |
| KI67        | 34,6         | 38,2 | 34,1 | 24,9 | 30,5 | 32,46  | 38,3          | 37,1 | 41,1 | 37,6 | 36,7 |  |
| KLRG1       | 20,9         | 24,4 | 12,8 | 5,6  | 10,5 | 14,84  | 12,1          | 17,4 | 12   | 10,1 | 14,3 |  |
| Neuropilin1 | 68,2         | 57,3 | 54,7 | 38,1 | 50,1 | 53,68  | 50,2          | 70,7 | 55,5 | 53   | 58,1 |  |
| PD1         |              | 43,1 | 35   | 28,9 | 38,7 | 36,425 | 40,6          | 55,2 | 42,7 | 44,6 | 40,4 |  |
| Tbet        | 15,6         | 9,2  | 1,16 | 19,8 | 13,9 | 11,932 | 11,8          | 9,45 | 9,61 | 13,2 | 13,4 |  |

**Supplementary Figure 15h**

|             | PHP.GFAP-GFP |      |      |      |      |        | PHP.GFAP-IL-2 |      |      |      |      |  |
|-------------|--------------|------|------|------|------|--------|---------------|------|------|------|------|--|
| CD25        | 62,6         | 63,6 | 50   | 41,7 | 42,8 | 52,14  | 53,8          | 58,2 | 49,3 | 41,4 | 83,3 |  |
| CD44        | 50           | 40,9 | 62,5 | 68,4 | 65,7 | 57,5   | 53,6          | 60   | 57,5 | 65,5 | 50   |  |
| CD62L       | 3,99         | 4,55 | 0    | 1,48 | 1,1  | 2,224  | 2,85          | 1,91 | 3,1  | 4,6  | 0    |  |
| CD69        | 41,2         | 36,4 | 45,8 | 18,8 | 17,2 | 31,88  | 25,9          | 28   | 29,9 | 35,6 | 50   |  |
| CD103       | 22,6         | 27,3 | 25   | 14,8 | 26,8 | 23,3   | 32,1          | 38,1 | 23,4 | 32,2 | 33,3 |  |
| CTLA4       | 83,3         | 86,4 | 54,2 | 58   | 75,2 | 71,42  | 82,8          | 76,7 | 74,9 | 71,3 | 100  |  |
| GITR        | 95,7         | 90,9 | 87,5 | 88,1 | 88,9 | 90,22  | 92,3          | 93,2 | 86,5 | 83,9 | 100  |  |
| Helios      | 77,1         | 63,6 | 83,3 | 77,8 | 74,5 | 75,26  | 71,8          | 74,5 | 72,7 | 82,8 | 50   |  |
| ICOS        | 76,5         | 77,3 | 62,5 | 59,8 | 80,6 | 71,34  | 82            | 80,3 | 69,3 | 72,4 | 83,3 |  |
| KI67        | 46,9         | 50   | 58,3 | 39   | 61,3 | 51,1   | 45,5          | 46,4 | 40,3 | 51,7 | 33,3 |  |
| KLRG1       | 22,6         | 36,4 | 33,3 | 24,7 | 27,3 | 28,86  | 27,9          | 30,2 | 31,3 | 14,9 | 33,3 |  |
| Neuropilin1 | 53,7         | 54,5 | 33,3 | 74,6 | 81,3 | 59,48  | 73,1          | 64,1 | 55,2 | 50,6 | 50   |  |
| PD1         | 22           | 22,7 | 8,33 | 39   | 30,3 | 24,466 | 24,9          | 23,9 | 22,3 | 11,5 | 33,3 |  |
| Tbet        | 7,4          | 13,6 | 20,8 | 11,4 | 10,9 | 12,82  | 5,13          | 8,83 | 12,4 | 21,8 | 0    |  |

**Supplementary Figure 15i**

|             | PHP.GFAP-GFP |      |      |      |      |      | PHP.GFAP-IL-2 |      |      |      |      |      |      |
|-------------|--------------|------|------|------|------|------|---------------|------|------|------|------|------|------|
| CD25        | 55,1         | 55,2 | 49,9 | 51   | 48,4 | 68,6 | 53,3          | 73,4 | 61,4 | 64,6 | 71,2 | 42,7 | 57,5 |
| CD44        | 47,7         | 37,8 | 37,4 | 28,4 | 24,9 | 44,6 | 50,4          | 41,7 | 45   | 57,3 | 31,2 | 13,5 | 24,3 |
| CD62L       | 0,9          | 1,39 | 2,85 | 0,83 | 2,35 | 0,92 | 3,11          | 1,98 | 2,31 | 0,56 | 5    | 4,49 | 3,26 |
| CD69        | 60,1         | 59,2 | 50,9 | 46,4 | 39   | 49,6 | 41,7          | 45,6 | 50,2 | 70,7 | 55   | 37,1 | 53   |
| CD103       | 57,4         | 47,4 | 53,9 | 37,8 | 35,7 | 55,5 | 47,6          | 42,1 | 37,5 | 43,9 | 37,5 | 39,3 | 60   |
| CTLA4       | 66,6         | 47,9 | 63,4 | 42,9 | 50,2 | 75,4 | 76,7          | 61,5 | 58,8 | 59,1 | 63,7 | 46,1 | 65,9 |
| GITR        | 86,1         | 83,6 | 86,8 | 76,6 | 78,9 | 87,8 | 87,5          | 77,8 | 84,7 | 78,6 | 77,5 | 70,8 | 79   |
| Helios      | 79,4         | 82,8 | 74,7 | 86,1 | 76,5 | 78   | 78,2          | 91,3 | 87,4 | 84,7 | 86,2 | 69,7 | 65   |
| ICOS        | 68,2         | 64,6 | 72,1 | 47   | 60,1 | 75,3 | 72,5          | 77   | 69,1 | 61,8 | 62,5 | 59,6 | 83,7 |
| KI67        | 43           | 27,5 | 41,5 | 22,9 | 27,2 | 42,4 | 51,6          | 54,8 | 37,6 | 29,1 | 48,8 | 24,7 | 37,5 |
| KLRG1       | 29           | 27,9 | 29,4 | 33,1 | 38,5 | 27,8 | 29,9          | 22,6 | 31,2 | 30,4 | 31,2 | 23,6 | 23,3 |
| Neuropilin1 | 92,8         | 90,6 | 87,4 | 87,4 | 83,1 | 94   | 94,8          | 88,1 | 90,6 | 88,3 | 86,2 | 74,2 | 80,7 |
| PD1         | 8,41         | 11,7 | 5,31 | 9,18 | 15   | 16,1 | 5,72          | 29,4 | 12,1 | 9,47 | 16,2 | 10,1 | 11,1 |



| Supplementary Figure 15j |      | PHP.GFAP-GFP |      |      |      |      | PHP.GFAP-IL-2 |      |      |      |      |      |
|--------------------------|------|--------------|------|------|------|------|---------------|------|------|------|------|------|
| D15                      | 0,69 | 0,84         | 0,83 | 1,01 | 1,46 |      |               | 1,01 | 1,79 | 0,48 | 0,99 | 1,38 |
| D21                      | 4,15 | 2,7          | 2,04 | 1,03 | 0,56 |      |               | 7,21 | 7,49 | 9,36 | 5,77 | 5,78 |
| D30                      | 1,47 | 4,25         | 0,84 | 1,25 | 0    | 0,22 | 0,083         | 1,08 | 0,13 | 0    | 0,45 | 0    |

| Supplementary Figure 15k |      | PHP.GFAP-GFP |      |      |      |      | PHP.GFAP-IL-2 |      |      |      |  |  |
|--------------------------|------|--------------|------|------|------|------|---------------|------|------|------|--|--|
| D15                      | 0,48 | 0,42         | 0,6  | 0,2  | 0,24 | 0,41 | 0,27          | 0,78 | 0,76 | 1,92 |  |  |
| D21                      | 4,15 | 2,7          | 2,04 | 1,03 | 0,56 | 10,5 | 3,2           | 4,07 | 3,22 | 5,76 |  |  |

| Supplementary Figure 15l |      | PHP.GFAP-GFP |      |      |      |      | PHP.GFAP-IL-2 |      |      |      |      |      |
|--------------------------|------|--------------|------|------|------|------|---------------|------|------|------|------|------|
| D15                      | 12,1 | 6,41         | 13,5 | 3,9  | 2,66 |      |               | 6,18 | 7,61 | 7,74 | 11,5 | 9,52 |
| D21                      | 29,3 | 32,1         | 26   | 36   | 44,4 |      |               | 37,7 | 37,3 | 23,1 | 22,4 | 21   |
| D30                      | 9,59 | 8,79         | 6,68 | 3,51 | 31   | 10,7 | 15,4          | 10,8 | 11,6 | 9,3  | 10,8 | 12,2 |

| Supplementary Figure 15m |       | PHP.GFAP-GFP |       |       |       |       | PHP.GFAP-IL-2 |       |       |       |  |  |
|--------------------------|-------|--------------|-------|-------|-------|-------|---------------|-------|-------|-------|--|--|
| D15                      | 19,56 | 23,82        | 29,91 | 21,36 | 13,71 | 41,49 | 12,46         | 32,01 | 30,86 | 25,76 |  |  |
| D21                      | 53,87 | 55,06        | 48,62 | 46,19 | 32,4  | 41,86 | 46,34         | 47,35 | 54,18 | 44,53 |  |  |

| Supplementary Figure 15n |      | PHP.GFAP-GFP |      |      |      |      | PHP.GFAP-IL-2 |      |      |      |      |      |
|--------------------------|------|--------------|------|------|------|------|---------------|------|------|------|------|------|
| D15                      | 35,3 | 44,8         | 56,4 | 42,2 | 32,6 |      |               | 57,3 | 35   | 53,6 | 55,3 | 47,2 |
| D21                      | 59,7 | 54,2         | 57,6 | 58,1 | 52,3 |      |               | 52,5 | 66,6 | 45,6 | 53,9 | 46   |
| D30                      | 3,65 | 1,73         | 8,42 | 9,52 | 19,7 | 28,6 | 15,4          | 34,4 | 29,5 | 32,3 | 22,1 | 12,2 |

| Supplementary Figure 15o |      | PHP.GFAP-GFP |      |      |      |      | PHP.GFAP-IL-2 |      |      |      |      |      |
|--------------------------|------|--------------|------|------|------|------|---------------|------|------|------|------|------|
| D15                      | 60,9 | 60           | 72,2 | 55,2 | 52,8 |      |               | 69,5 | 52,1 | 61,9 | 70   | 60,8 |
| D21                      | 92   | 90,5         | 86,7 | 87,1 | 84,9 |      |               | 89,9 | 86,9 | 79,9 | 85,7 | 86,8 |
| D30                      | 49,1 | 38,5         | 51   | 47,4 | 71,8 | 80,1 | 79,3          | 77,4 | 86,6 | 81,1 | 56,3 | 75,6 |

| Supplementary Figure 15p |      | PHP.GFAP-GFP |      |      |      |      | PHP.GFAP-IL-2 |      |      |      |      |      |
|--------------------------|------|--------------|------|------|------|------|---------------|------|------|------|------|------|
| D15                      | 18,3 | 19,3         | 25,6 | 9,92 | 6,7  |      |               | 26,2 | 16,2 | 21,2 | 29,1 | 22,4 |
| D21                      | 64,9 | 60,4         | 52,1 | 60,3 | 54,8 |      |               | 65,6 | 58,7 | 46,8 | 55,2 | 59,5 |
| D30                      | 48,4 | 55,4         | 52,7 | 70,4 | 56,8 | 74,8 |               | 52,7 | 41,9 | 57,9 | 53   | 53   |

| Supplementary Figure 15q |      | PHP.GFAP-GFP |      |      |      |      | PHP.GFAP-IL-2 |      |      |      |  |  |
|--------------------------|------|--------------|------|------|------|------|---------------|------|------|------|--|--|
| D15                      | 1,26 | 2,32         | 1,81 | 2,06 | 0,71 | 4,09 | 1,26          | 4,91 | 3,26 | 2,96 |  |  |
| D21                      | 52,7 | 53           | 45,6 | 42,6 | 30,6 | 40,6 | 44,3          | 42,6 | 51,3 | 42,7 |  |  |

| Supplementary Figure 15r |      | PHP.GFAP-GFP |      |      |      |      | PHP.GFAP-IL-2 |      |      |      |  |  |
|--------------------------|------|--------------|------|------|------|------|---------------|------|------|------|--|--|
| CD4conv                  | 32,2 | 40           | 31,7 | 39,4 | 33,8 | 34,4 | 34,2          | 32,1 | 33,7 | 36,1 |  |  |
| Tregs                    | 3,44 | 3,21         | 3,3  | 4,07 | 3,68 | 4,03 | 4,21          | 3,9  | 4,65 | 3,71 |  |  |
| CD8                      | 31,1 | 34,9         | 27,4 | 28,4 | 30,4 | 29,6 | 29,9          | 27   | 27,2 | 25,8 |  |  |
| B cells                  | 25,5 | 17,6         | 30,4 | 22,4 | 27,8 | 23   | 27            | 29,3 | 24,9 | 26,6 |  |  |
| NK cells                 | 0,36 | 0,53         | 0,19 | 0,3  | 0,38 | 0,16 | 0,52          | 0,28 | 0,29 | 0,4  |  |  |

| Supplementary Figure 15s |      | PHP.GFAP-GFP |      |      |      |      | PHP.GFAP-IL-2 |      |      |      |  |
|--------------------------|------|--------------|------|------|------|------|---------------|------|------|------|--|
| CD4conv                  | 28,1 | 21           | 30,9 | 39,2 | 29,4 | 31,9 | 36            | 33,9 | 34,2 | 38,2 |  |
| Tregs                    | 3,51 | 2,48         | 2,98 | 3,58 | 3,13 | 3,22 | 4,66          | 4,94 | 4,66 | 3,83 |  |
| CD8                      | 25,2 | 22,7         | 28,6 | 32,1 | 29,6 | 28,6 | 33,1          | 31,1 | 29,9 | 28,6 |  |
| B cells                  | 38,7 | 47,8         | 32,6 | 20   | 32,8 | 30,5 | 21,3          | 23,6 | 26,3 | 22,6 |  |
| NK cells                 | 0,54 | 0,63         | 0,45 | 0,84 | 0,73 | 0,42 | 0,42          | 0,48 | 0,51 | 0,52 |  |

| Supplementary Figure 15t |        | PHP.GFAP-GFP |        |        |        |        | PHP.GFAP-IL-2 |        |        |        |  |
|--------------------------|--------|--------------|--------|--------|--------|--------|---------------|--------|--------|--------|--|
| CD4conv                  | 667575 | 894063       | 391332 | 830446 | 875011 | 396821 | 430176        | 221463 | 413692 | 187857 |  |
| Tregs                    | 71223  | 71836        | 40636  | 85699  | 95243  | 46416  | 52970         | 26921  | 57017  | 19308  |  |
| CD8                      | 644000 | 781616       | 337276 | 597608 | 785445 | 340946 | 376340        | 186047 | 333346 | 134152 |  |
| B cells                  | 529613 | 393467       | 375276 | 471284 | 719277 | 265508 | 339898        | 202335 | 304746 | 138263 |  |
| NK cells                 | 7398   | 11940        | 2294   | 6370   | 9806   | 1865   | 6562          | 1902   | 3529   | 2055   |  |

| Supplementary Figure 15u |         | PHP.GFAP-GFP |        |         |        |        | PHP.GFAP-IL-2 |         |         |         |  |
|--------------------------|---------|--------------|--------|---------|--------|--------|---------------|---------|---------|---------|--|
| CD4conv                  | 1189200 | 342087       | 355733 | 1386803 | 370750 | 787850 | 2213933       | 2371017 | 4518683 | 2013600 |  |
| Tregs                    | 148560  | 40327        | 34267  | 126480  | 39400  | 79400  | 286400        | 345217  | 616733  | 201920  |  |
| CD8                      | 1066880 | 370607       | 328600 | 1134410 | 373150 | 705600 | 2035200       | 2176417 | 3951153 | 1509200 |  |
| B cells                  | 1635920 | 779240       | 375200 | 707143  | 412400 | 751400 | 1311667       | 1647217 | 3474490 | 1191040 |  |
| NK cells                 | 22800   | 10273        | 5133   | 29637   | 9250   | 10450  | 25867         | 33367   | 67860   | 27520   |  |
